# Supplementary material for: Comparison of maternal and neonatal complications between first and second stage of labor cesarean deliveries at Mekelle public hospitals: a prospective cross-sectional study from February 2023 – June 2023
Source: Research Square preprint supplement (doi:10.21203/rs.3.rs-6957859/v1), 2025-08-19
Supplement: Supplementary file 1 [file 090d51964435c78dd3a885b2.xlsx]

## Sheet: haftom spss
MRN	BMI	age	address	ethinicity	religion	marital_status	refferal	educational_status	occupation	income	gravidity	parity	was_there_CD_previously	if_yes_CD_no	indication_of_last_CD	other_indications	Abortion	if_yes	if_induced	ectopic	If_it_is_yes_mode_of_management	GTD	antenatal_care	If_Yes_Place_of_ANC_given	Gestational_age_determination	Mode_of_gestational_age_determination	Gestational_age	Number_of_fetus	Indication_for_CD	if_other_specify_indication	Level_of_deciding_physicians	level_of_surgeon	Stage_of_labors	Duration_of_ROM	FHB	Obstetric_complication	if_complication_yes_specify	Known_chronic_medical_illnesses	if_yes_CMI_specify	Interventions	Mode_of_anesthesia	Cleansing_method	Vaginal_cleansing	Skin_incision	Type_uterine_incision	Meconium_stained_amniotic_fluid	Paracolic_gutter_packing	Intraop_glove_change	Mode_of_extraction
914879	2	30	2	1	1	2	2	2	2	2	2	2	1	2	8	""	2	#NULL!	#NULL!	2	#NULL!	2	1	4	2	1	5	1	12	"2 CD scar"	2	2	1	1	1	2	""	2	""	5	2	2	2	2	1	2	2	2	1
687112	2	38	2	1	1	2	3	2	1	4	3	3	2	#NULL!	#NULL!	""	2	#NULL!	#NULL!	2	#NULL!	2	1	2	2	1	4	2	3	""	2	2	1	1	1	1	"multiple gestation"	2	""	5	2	2	2	2	1	2	2	2	2
910637	2	27	2	1	1	2	2	2	1	4	1	1	3	#NULL!	#NULL!	""	2	#NULL!	#NULL!	2	#NULL!	2	1	1	1	#NULL!	#NULL!	1	8	""	2	1	1	1	2	1	"preeclampsia"	2	""	5	2	2	2	2	1	2	2	2	1
733280	2	37	2	1	1	2	3	2	1	4	2	2	1	2	8	""	1	1	#NULL!	2	#NULL!	2	1	2	2	1	3	1	12	"2 CD scar in labor"	2	2	1	1	1	2	""	2	""	5	2	2	2	2	1	2	2	2	1
911819	2	30	1	1	1	2	2	2	1	4	2	2	1	1	11	""	1	1	#NULL!	2	#NULL!	2	1	1	2	1	4	1	11	""	2	1	1	1	2	2	""	2	""	5	2	2	2	2	1	1	1	1	1
911792	2	35	2	1	1	2	3	2	1	4	1	1	3	#NULL!	#NULL!	""	1	1	#NULL!	2	#NULL!	2	1	2	2	1	4	1	12	"prolonged SSOL "	2	1	2	1	1	2	""	2	""	5	2	2	2	2	1	2	2	2	1
927397	2	24	2	1	1	2	3	2	1	4	2	2	1	1	6	""	2	#NULL!	#NULL!	2	#NULL!	2	1	1	2	1	4	1	10	""	2	1	1	1	1	2	""	2	""	5	3	2	2	2	1	1	2	2	1
921616	2	28	2	1	1	1	2	2	3	2	2	2	1	1	11	""	2	#NULL!	#NULL!	2	#NULL!	2	1	2	2	1	3	1	10	""	2	2	1	1	1	1	"GDM"	2	""	5	2	2	2	2	1	2	2	2	1
886079	2	20	2	1	1	2	3	2	1	4	1	1	3	#NULL!	#NULL!	""	2	#NULL!	#NULL!	2	#NULL!	2	1	2	2	1	6	1	5	""	2	1	1	1	1	2	""	2	""	1	2	2	2	2	1	2	2	2	1
910228	2	23	2	1	1	2	3	2	2	2	1	1	3	#NULL!	#NULL!	""	2	#NULL!	#NULL!	2	#NULL!	2	1	1	2	1	4	1	8	""	2	2	1	1	3	2	""	2	""	5	2	2	2	2	1	1	1	1	1
912605	2	32	2	1	1	2	3	2	1	4	1	1	3	#NULL!	#NULL!	""	2	#NULL!	#NULL!	2	#NULL!	2	1	1	2	1	4	1	2	""	2	2	2	2	1	1	"preeclampsia"	2	""	1	2	2	2	2	1	2	2	2	1
872669	3	23	2	1	1	2	3	2	2	2	1	1	1	1	11	""	2	#NULL!	#NULL!	2	#NULL!	2	1	3	1	#NULL!	#NULL!	1	8	""	2	2	2	1	2	2	""	2	""	5	2	2	1	2	1	2	2	2	1
901646	2	25	2	1	1	2	3	2	2	1	1	1	3	#NULL!	#NULL!	""	2	#NULL!	#NULL!	2	#NULL!	2	1	2	1	#NULL!	#NULL!	1	8	""	2	1	1	1	2	2	""	2	""	5	4	2	2	2	1	2	2	2	1
808604	2	38	2	1	1	2	3	2	2	2	3	3	2	#NULL!	#NULL!	""	2	#NULL!	#NULL!	2	#NULL!	2	1	1	2	1	3	1	8	""	2	1	1	1	3	2	""	2	""	5	2	2	1	2	1	2	2	2	1
895791	2	27	2	1	1	2	3	2	1	4	2	2	1	1	3	""	2	#NULL!	#NULL!	2	#NULL!	2	1	2	1	#NULL!	#NULL!	1	10	""	2	1	1	1	1	2	""	2	""	5	2	2	2	2	1	2	2	2	1
927461	2	26	1	1	1	2	2	2	1	4	1	1	3	#NULL!	#NULL!	""	2	#NULL!	#NULL!	2	#NULL!	2	1	1	2	1	3	1	3	""	2	1	1	1	1	2	""	2	""	5	2	2	2	2	1	2	2	2	1
888288	2	27	2	1	1	2	3	2	1	4	1	1	3	#NULL!	#NULL!	""	2	#NULL!	#NULL!	2	#NULL!	2	1	2	2	1	5	1	8	""	2	1	1	1	2	2	""	2	""	5	2	2	2	2	1	2	2	2	1
891775	2	28	1	1	1	2	3	2	1	4	2	2	1	1	11	""	2	#NULL!	#NULL!	2	#NULL!	2	1	2	2	1	4	1	8	""	2	2	2	1	3	2	""	2	""	4	2	2	2	2	1	1	1	1	1
912069	2	38	2	1	1	2	2	2	1	4	2	2	1	1	11	""	2	#NULL!	#NULL!	2	#NULL!	2	1	1	1	#NULL!	#NULL!	1	8	""	2	1	1	1	3	2	""	2	""	5	2	2	2	2	1	2	2	2	1
912906	2	22	2	1	#NULL!	2	3	2	1	4	2	1	3	#NULL!	#NULL!	""	1	1	#NULL!	2	#NULL!	2	1	1	2	1	4	1	8	""	2	1	1	1	3	2	""	2	""	5	2	2	1	2	1	2	2	2	1
914065	2	18	1	1	1	2	2	2	1	4	1	1	3	#NULL!	#NULL!	""	2	#NULL!	#NULL!	2	#NULL!	2	1	1	2	1	5	1	8	""	2	1	1	2	3	2	""	2	""	5	2	2	1	2	1	2	2	2	1
914505	2	38	2	1	1	2	3	2	3	2	2	2	2	#NULL!	#NULL!	""	1	1	#NULL!	2	#NULL!	2	1	1	2	1	5	1	8	""	2	1	1	1	3	2	""	2	""	5	2	2	1	2	1	2	2	2	1
914445	2	27	2	1	1	2	3	2	1	4	2	2	1	1	11	""	2	#NULL!	#NULL!	2	#NULL!	2	1	1	2	1	4	1	10	""	2	1	1	2	1	2	""	2	""	5	2	2	1	2	1	2	2	2	1
882520	2	32	2	1	1	2	3	2	1	4	2	2	2	#NULL!	#NULL!	""	2	#NULL!	#NULL!	2	#NULL!	2	1	2	2	1	4	1	5	""	2	1	1	1	1	2	""	2	""	1	2	2	2	2	1	2	2	2	1
909245	2	37	2	1	1	2	2	2	1	4	3	3	1	1	11	""	1	1	#NULL!	2	#NULL!	2	1	1	2	1	3	1	10	""	2	1	1	1	1	2	""	2	""	5	2	2	2	2	1	2	2	2	1
911626	2	21	2	1	1	2	3	2	2	2	1	1	3	#NULL!	#NULL!	""	2	#NULL!	#NULL!	2	#NULL!	2	1	1	2	1	4	1	8	""	2	1	1	1	3	2	""	2	""	5	2	2	1	2	1	2	2	2	1
911070	2	24	2	1	1	2	2	2	2	2	1	1	3	#NULL!	#NULL!	""	2	#NULL!	#NULL!	2	#NULL!	2	1	2	2	2	3	1	5	""	2	2	1	2	1	1	"preeclampsia"	2	""	1	2	2	1	2	1	2	2	2	1
909020	2	32	1	1	1	2	3	1	1	4	2	2	1	1	10	"repaired fistula"	2	#NULL!	#NULL!	2	#NULL!	2	1	2	1	#NULL!	#NULL!	1	10	""	2	1	1	1	1	2	""	2	""	5	2	2	2	2	1	2	2	2	1
806001	2	34	2	1	1	2	3	1	1	4	2	2	1	1	3	""	2	#NULL!	#NULL!	2	#NULL!	2	1	2	2	1	4	1	10	""	2	1	1	1	1	2	""	2	""	5	2	2	2	2	1	2	2	2	1
978034	2	35	2	1	1	2	3	2	1	4	2	2	1	1	11	""	1	1	#NULL!	2	#NULL!	2	1	4	2	1	4	1	8	""	2	2	2	1	2	2	""	2	""	5	4	2	2	2	1	2	2	2	1
916990	2	26	2	1	1	2	3	2	2	1	1	1	3	#NULL!	#NULL!	""	2	#NULL!	#NULL!	2	#NULL!	2	1	1	2	1	4	1	5	""	2	1	1	1	1	2	""	2	""	1	2	2	2	2	1	2	2	2	1
812955	2	28	2	1	1	2	2	2	1	4	1	1	3	#NULL!	#NULL!	""	2	#NULL!	#NULL!	2	#NULL!	2	1	1	2	1	4	1	8	""	2	1	1	2	3	2	""	2	""	1	2	2	2	2	1	2	2	2	1
896979	2	22	2	1	1	2	3	2	3	2	1	1	3	#NULL!	#NULL!	""	2	#NULL!	#NULL!	2	#NULL!	2	1	4	2	1	5	1	8	""	2	1	1	1	3	2	""	2	""	5	2	2	2	2	1	2	2	2	1
794261	2	23	2	1	1	2	3	2	1	4	2	2	1	1	3	""	2	#NULL!	#NULL!	2	#NULL!	2	1	2	2	1	3	1	10	""	2	1	1	1	1	2	""	2	""	5	2	2	2	2	1	2	2	2	1
918020	2	29	2	1	1	2	2	2	2	1	2	2	2	#NULL!	#NULL!	""	2	#NULL!	#NULL!	2	#NULL!	2	1	2	2	1	4	1	9	""	2	1	1	1	1	2	""	2	""	5	2	2	2	2	1	2	2	2	1
912959	2	25	2	1	1	2	3	2	2	1	1	1	3	#NULL!	#NULL!	""	2	#NULL!	#NULL!	2	#NULL!	2	1	2	2	1	5	1	5	""	2	2	1	1	1	2	""	2	""	1	2	2	2	2	1	2	2	2	1
923061	2	24	1	1	1	2	2	2	1	4	1	1	3	#NULL!	#NULL!	""	2	#NULL!	#NULL!	2	#NULL!	2	1	1	2	1	4	1	3	""	2	1	1	1	1	1	"preeclampsia"	2	""	5	2	2	2	2	1	2	2	2	1
917313	2	28	2	1	1	2	3	2	1	4	2	2	1	1	11	""	2	#NULL!	#NULL!	2	#NULL!	2	1	4	2	1	6	1	8	""	2	2	1	1	2	2	""	2	""	5	4	2	2	2	1	2	2	2	1
473645	2	30	2	1	#NULL!	2	3	2	1	4	1	1	3	#NULL!	#NULL!	""	2	#NULL!	#NULL!	2	#NULL!	2	1	2	2	1	5	1	8	""	2	1	1	1	2	2	""	2	""	5	4	2	2	2	1	2	2	2	1
921094	2	25	2	1	1	2	3	2	1	4	2	2	1	1	11	""	2	#NULL!	#NULL!	2	#NULL!	2	1	1	2	1	4	1	10	""	2	1	1	1	1	2	""	2	""	5	2	2	2	2	1	2	2	2	1
920914	2	23	2	1	1	2	3	2	1	4	2	2	1	1	11	""	2	#NULL!	#NULL!	2	#NULL!	2	1	1	2	1	4	1	10	""	2	1	1	1	1	2	""	2	""	5	2	2	2	2	1	2	2	2	1
921018	2	30	2	1	1	2	3	2	3	1	1	1	3	#NULL!	#NULL!	""	2	#NULL!	#NULL!	2	#NULL!	2	1	2	2	1	4	1	11	""	2	1	1	1	1	2	""	2	""	5	2	2	2	2	1	2	2	2	1
860808	2	30	1	1	1	2	3	2	1	4	3	3	1	2	11	""	2	#NULL!	#NULL!	2	#NULL!	2	1	2	1	#NULL!	#NULL!	1	12	"2 CD scar in labor"	2	2	1	1	1	2	""	2	""	5	2	2	1	2	1	2	2	2	1
920266	2	25	2	1	1	2	2	2	1	4	2	2	2	#NULL!	#NULL!	""	2	#NULL!	#NULL!	2	#NULL!	2	1	1	2	1	6	1	2	""	2	2	2	1	1	2	""	2	""	5	2	2	2	2	1	1	2	2	1
916953	2	19	2	1	1	4	3	2	2	1	1	1	3	#NULL!	#NULL!	""	2	#NULL!	#NULL!	2	#NULL!	2	2	#NULL!	2	1	2	1	8	""	2	1	1	1	3	2	""	2	""	5	2	2	1	2	1	2	2	2	1
923146	2	27	2	1	1	2	3	2	2	1	1	1	3	#NULL!	#NULL!	""	2	#NULL!	#NULL!	2	#NULL!	2	1	1	2	1	4	1	8	""	2	2	2	1	2	2	""	2	""	5	4	2	2	2	1	2	2	2	1
817093	2	22	2	1	1	2	3	2	1	4	2	2	1	1	10	"cord prolapse"	2	#NULL!	#NULL!	2	#NULL!	2	1	4	2	1	4	1	10	""	2	2	1	1	1	2	""	2	""	5	2	2	2	2	1	2	2	2	1
888217	2	21	2	1	1	2	3	2	1	4	1	1	3	#NULL!	#NULL!	""	2	#NULL!	#NULL!	2	#NULL!	2	1	4	1	#NULL!	#NULL!	1	11	""	2	1	1	1	1	2	""	2	""	5	2	2	2	2	1	2	2	2	1
874304	2	31	2	1	1	2	3	2	1	4	2	2	2	#NULL!	#NULL!	""	2	#NULL!	#NULL!	2	#NULL!	2	1	2	2	1	4	1	8	""	2	1	1	1	3	1	"polyhydramniosis"	2	""	5	2	2	2	2	1	2	2	2	1
913631	2	21	2	1	1	2	3	2	1	4	2	2	2	#NULL!	#NULL!	""	2	#NULL!	#NULL!	2	#NULL!	2	1	1	2	1	6	1	2	""	2	2	2	2	1	1	"postterm"	2	""	1	2	2	2	2	1	2	2	2	1
913813	2	30	2	1	1	2	3	2	1	4	2	2	2	#NULL!	#NULL!	""	2	#NULL!	#NULL!	2	#NULL!	2	1	1	2	1	5	1	2	""	2	2	2	1	1	2	""	2	""	5	2	2	2	2	1	2	2	2	1
912802	2	35	2	1	1	2	3	2	1	4	2	2	2	#NULL!	#NULL!	""	2	#NULL!	#NULL!	2	#NULL!	2	1	4	2	1	4	1	8	""	2	2	1	1	3	1	"preeclampsia"	2	""	5	2	2	2	2	1	2	2	2	1
895323	2	29	2	1	1	2	3	2	1	4	2	2	1	1	6	""	1	1	#NULL!	2	#NULL!	2	1	2	1	#NULL!	#NULL!	1	10	""	2	2	1	1	1	2	""	2	""	5	2	2	2	2	1	2	2	2	1
918917	2	24	2	1	1	2	2	2	1	4	2	1	3	#NULL!	#NULL!	""	1	1	#NULL!	2	#NULL!	2	1	2	2	1	4	1	3	""	2	1	1	1	1	2	""	2	""	5	2	2	2	2	1	2	2	2	2
882628	2	26	2	1	1	2	3	2	2	1	1	1	3	#NULL!	#NULL!	""	2	#NULL!	#NULL!	2	#NULL!	2	1	2	2	1	5	1	8	""	2	2	1	1	3	1	"APH"	2	""	5	2	2	2	2	1	2	2	2	1
918898	2	22	2	1	1	2	2	2	1	4	1	1	3	#NULL!	#NULL!	""	2	#NULL!	#NULL!	2	#NULL!	2	1	4	2	1	6	1	8	""	2	1	1	1	3	2	""	2	""	1	2	2	2	2	1	1	1	1	1
924327	2	23	2	1	1	2	3	2	1	4	1	1	3	#NULL!	#NULL!	""	2	#NULL!	#NULL!	2	#NULL!	2	1	2	2	1	4	1	5	""	2	1	1	2	1	2	""	2	""	1	2	2	2	2	1	2	2	2	1
903810	2	33	2	1	1	2	3	2	2	2	2	2	1	2	11	""	2	#NULL!	#NULL!	2	#NULL!	2	1	2	2	1	3	1	12	"2 CD scar in labor"	2	2	1	1	1	2	""	2	""	5	2	2	2	2	1	2	2	2	1
912064	2	22	2	1	1	2	3	2	3	2	1	1	3	#NULL!	#NULL!	""	2	#NULL!	#NULL!	2	#NULL!	2	1	2	2	1	5	1	5	""	2	1	1	2	1	2	""	2	""	1	2	2	1	2	1	2	2	2	1
923616	2	30	2	1	1	2	3	2	1	4	2	2	2	#NULL!	#NULL!	""	1	1	#NULL!	2	#NULL!	2	1	1	2	1	4	1	8	""	2	2	1	1	3	2	""	2	""	5	2	2	2	2	1	1	2	2	1
926855	2	38	1	2	2	2	2	1	1	4	3	3	2	#NULL!	#NULL!	""	2	#NULL!	#NULL!	2	#NULL!	2	1	1	1	#NULL!	#NULL!	2	3	""	2	2	1	2	1	1	"multiple pregnancy"	2	""	5	2	2	2	2	1	2	2	2	2
759850	2	26	2	1	1	2	3	2	1	4	2	2	1	1	11	""	2	#NULL!	#NULL!	2	#NULL!	2	1	1	1	#NULL!	#NULL!	1	8	""	2	1	1	1	3	2	""	2	""	5	2	2	2	2	1	2	2	2	1
924849	2	30	2	1	1	2	3	1	1	4	2	2	1	1	11	""	2	#NULL!	#NULL!	2	#NULL!	2	1	2	2	1	4	1	10	""	2	2	1	1	1	2	""	2	""	5	2	2	1	2	1	2	2	2	1
924868	2	28	1	1	1	2	3	2	1	4	2	2	1	1	11	""	2	#NULL!	#NULL!	2	#NULL!	2	2	#NULL!	2	1	4	1	10	""	2	2	1	1	1	2	""	2	""	5	2	2	2	2	1	2	2	2	1
925005	2	23	2	1	1	2	3	2	1	4	1	1	3	#NULL!	#NULL!	""	2	#NULL!	#NULL!	2	#NULL!	2	1	2	1	#NULL!	#NULL!	2	3	""	2	1	1	1	1	2	""	2	""	5	2	2	2	2	1	2	2	2	2
888136	2	24	2	1	1	2	3	2	1	4	2	2	1	1	2	""	2	#NULL!	#NULL!	2	#NULL!	2	1	2	2	1	4	1	10	""	2	1	1	1	1	2	""	2	""	5	2	2	1	2	1	2	2	2	1
915834	2	20	2	1	1	2	3	2	3	2	1	1	3	#NULL!	#NULL!	""	2	#NULL!	#NULL!	2	#NULL!	2	1	2	2	1	4	1	5	""	2	1	1	2	1	2	""	2	""	1	2	2	2	2	1	2	2	2	1
916181	2	38	2	1	1	2	2	2	3	2	2	2	2	#NULL!	#NULL!	""	2	#NULL!	#NULL!	2	#NULL!	2	1	4	2	1	3	1	12	"cord prolapse"	2	2	1	1	1	2	""	2	""	5	2	2	2	2	1	2	2	2	1
915977	2	34	1	1	1	2	3	1	1	4	2	2	1	1	11	""	2	#NULL!	#NULL!	2	#NULL!	2	1	1	1	#NULL!	#NULL!	1	8	""	2	2	2	2	2	2	""	2	""	4	4	2	2	2	1	2	2	2	1
916137	2	24	2	1	1	2	3	2	3	1	1	1	3	#NULL!	#NULL!	""	2	#NULL!	#NULL!	2	#NULL!	2	1	1	2	1	4	1	3	""	2	2	1	1	1	2	""	2	""	5	2	2	1	2	1	2	2	2	1
916333	2	36	2	1	1	2	3	2	2	2	2	2	2	#NULL!	#NULL!	""	2	#NULL!	#NULL!	2	#NULL!	2	1	1	1	#NULL!	#NULL!	1	8	""	2	1	1	1	3	2	""	2	""	5	2	2	1	2	1	2	2	2	1
916681	2	22	2	1	1	2	3	2	1	4	1	1	3	#NULL!	#NULL!	""	2	#NULL!	#NULL!	2	#NULL!	2	1	2	2	1	3	1	8	""	2	1	1	1	3	2	""	2	""	5	2	2	2	2	1	2	2	2	1
889487	2	27	2	1	1	2	3	2	1	4	2	2	1	1	11	""	2	#NULL!	#NULL!	2	#NULL!	2	1	2	1	#NULL!	#NULL!	1	10	""	2	2	1	1	1	2	""	2	""	5	2	2	2	2	1	2	2	2	1
875177	2	30	2	1	1	2	3	2	1	4	2	2	1	1	6	""	2	#NULL!	#NULL!	2	#NULL!	2	1	2	2	1	5	1	8	""	2	2	1	1	3	2	""	2	""	5	2	2	1	2	1	2	2	2	1
919969	2	23	2	1	1	2	3	2	1	4	2	2	2	#NULL!	#NULL!	""	2	#NULL!	#NULL!	2	#NULL!	2	1	1	2	1	3	2	3	""	2	1	1	1	1	1	"multiple pregnancy"	2	""	5	2	2	1	2	1	2	2	2	2
923146	2	27	2	1	1	2	3	2	1	4	2	2	2	#NULL!	#NULL!	""	2	#NULL!	#NULL!	2	#NULL!	2	1	1	2	1	4	1	8	""	2	1	1	1	1	2	""	2	""	5	2	2	2	2	1	2	2	2	2
914006	2	22	2	1	1	2	3	2	1	4	1	1	3	#NULL!	#NULL!	""	2	#NULL!	#NULL!	2	#NULL!	2	1	4	2	1	4	1	8	""	2	2	1	2	3	2	""	2	""	5	2	2	1	2	1	2	2	2	1
881770	2	26	2	1	1	2	3	2	3	2	1	1	3	#NULL!	#NULL!	""	2	#NULL!	#NULL!	2	#NULL!	2	1	4	2	1	4	1	3	""	2	1	1	1	1	2	""	2	""	5	2	2	2	2	1	2	2	2	2
927807	2	35	2	1	1	2	2	2	1	4	1	1	3	#NULL!	#NULL!	""	2	#NULL!	#NULL!	2	#NULL!	2	1	2	2	1	4	1	8	""	2	2	1	1	3	2	""	2	""	5	2	2	1	2	1	1	1	1	1
926321	2	27	2	1	1	2	2	2	1	4	1	1	3	#NULL!	#NULL!	""	2	#NULL!	#NULL!	2	#NULL!	2	1	2	2	1	4	1	2	""	2	2	2	2	1	2	""	2	""	5	2	2	1	2	1	2	2	2	1
911262	2	23	2	1	2	2	3	2	1	4	1	1	3	#NULL!	#NULL!	""	2	#NULL!	#NULL!	2	#NULL!	2	1	2	2	1	5	1	11	""	2	1	1	1	1	2	""	2	""	5	2	2	2	2	1	2	2	2	1
906456	2	27	2	1	1	2	3	1	1	4	2	2	1	2	11	""	2	#NULL!	#NULL!	2	#NULL!	2	1	2	2	1	4	1	12	"2 CD scar in labor"	2	2	1	1	1	2	""	2	""	5	2	2	2	2	1	2	2	2	2
890891	2	22	2	1	1	2	3	2	1	4	1	1	3	#NULL!	#NULL!	""	2	#NULL!	#NULL!	2	#NULL!	2	1	1	2	1	4	1	3	""	2	1	1	1	1	2	""	2	""	5	2	2	2	2	1	2	2	2	2
915304	2	25	2	1	1	2	3	2	3	2	1	1	3	#NULL!	#NULL!	""	2	#NULL!	#NULL!	2	#NULL!	2	1	2	2	1	4	1	3	""	2	1	1	1	1	2	""	2	""	5	2	2	2	2	1	2	2	2	2
927579	2	32	1	1	1	2	2	1	1	4	2	2	1	1	4	""	2	#NULL!	#NULL!	2	#NULL!	2	1	1	2	1	4	1	8	""	2	1	1	2	3	2	""	2	""	5	2	2	2	2	1	2	2	2	1
714459	2	24	2	1	#NULL!	2	3	2	1	4	2	2	1	2	11	""	2	#NULL!	#NULL!	2	#NULL!	2	1	4	2	1	4	1	12	"2 CD scar in labor"	2	2	1	1	2	2	""	2	""	5	2	2	2	2	1	2	2	2	1
560643	2	27	2	1	1	2	3	2	3	2	2	2	1	2	9	""	2	#NULL!	#NULL!	2	#NULL!	2	1	4	2	1	4	2	12	"2 CD scar in labor"	2	1	1	1	1	2	""	2	""	5	2	2	2	2	1	2	2	2	1
904634	2	26	2	1	1	2	2	2	3	1	2	2	2	#NULL!	#NULL!	""	2	#NULL!	#NULL!	2	#NULL!	2	1	2	2	1	4	1	3	""	2	1	1	1	1	2	""	2	""	5	2	2	2	2	1	2	2	2	2
906963	2	28	2	1	1	2	3	2	1	4	2	2	2	#NULL!	#NULL!	""	2	#NULL!	#NULL!	2	#NULL!	2	1	1	2	1	5	1	3	""	2	2	1	1	1	2	""	2	""	5	2	2	2	2	1	2	2	2	2
924525	2	28	2	1	1	2	3	2	2	1	1	1	3	#NULL!	#NULL!	""	2	#NULL!	#NULL!	2	#NULL!	2	1	4	2	1	3	1	6	""	2	1	1	1	1	2	""	2	""	2	2	2	2	2	1	2	2	2	1
572577	2	33	2	1	1	2	3	2	2	1	2	2	1	2	11	""	2	#NULL!	#NULL!	2	#NULL!	2	1	2	2	1	4	1	12	"2 CD scar in labor"	2	2	1	1	1	2	""	2	""	5	2	2	2	2	1	2	2	2	1
602473	2	33	2	1	1	2	3	2	1	4	2	2	1	1	6	""	2	#NULL!	#NULL!	2	#NULL!	2	1	4	2	1	3	1	4	""	2	1	1	1	1	2	""	2	""	5	2	2	2	2	1	2	2	2	1
924525	2	23	2	1	1	2	3	2	1	4	1	1	3	#NULL!	#NULL!	""	2	#NULL!	#NULL!	2	#NULL!	2	1	1	2	1	4	1	5	""	2	1	1	2	1	1	"PROM"	2	""	1	2	2	2	2	1	2	2	2	1
735726	2	28	2	1	1	2	3	2	1	4	2	2	1	1	6	""	2	#NULL!	#NULL!	2	#NULL!	2	1	4	2	1	4	1	2	""	2	2	2	1	1	2	""	2	""	5	2	2	1	2	1	2	2	2	1
868796	2	27	2	1	1	2	3	2	1	4	2	1	3	#NULL!	#NULL!	""	1	1	#NULL!	2	#NULL!	2	1	2	2	1	5	1	8	""	2	1	1	1	3	2	""	2	""	2	2	2	2	2	1	2	2	2	1
881995	2	24	2	1	2	2	2	2	1	4	1	1	3	#NULL!	#NULL!	""	2	#NULL!	#NULL!	2	#NULL!	2	1	4	2	1	4	1	8	""	2	2	1	1	3	1	"gestational HTN"	2	""	5	2	2	1	2	1	2	2	2	1
911172	2	19	2	1	1	2	2	2	2	1	1	1	3	#NULL!	#NULL!	""	2	#NULL!	#NULL!	2	#NULL!	2	1	2	2	1	3	1	3	""	2	2	1	1	1	2	""	2	""	5	2	2	1	2	1	2	2	2	1
927687	2	21	2	1	1	2	3	2	1	4	1	1	3	#NULL!	#NULL!	""	2	#NULL!	#NULL!	2	#NULL!	2	1	1	2	1	5	1	8	""	2	1	1	1	3	2	""	2	""	5	2	2	2	2	1	2	2	2	1
927805	2	19	2	1	1	2	2	2	1	4	1	1	3	#NULL!	#NULL!	""	2	#NULL!	#NULL!	2	#NULL!	2	1	1	2	1	4	1	11	""	2	1	1	1	1	2	""	2	""	5	2	2	1	2	1	1	1	2	1
841077	2	29	2	1	1	2	3	2	2	2	2	2	2	#NULL!	#NULL!	""	2	#NULL!	#NULL!	2	#NULL!	2	1	2	2	1	4	1	9	""	2	1	1	1	1	2	""	2	""	5	2	2	2	2	1	2	2	2	1
927836	2	24	2	1	1	2	2	2	1	4	1	1	3	#NULL!	#NULL!	""	2	#NULL!	#NULL!	2	#NULL!	2	1	2	2	1	4	1	6	""	2	2	2	1	1	2	""	2	""	5	2	2	2	2	1	2	2	2	1
904490	2	22	2	1	1	2	3	2	3	1	2	1	3	#NULL!	#NULL!	""	1	1	#NULL!	2	#NULL!	2	1	2	2	2	3	1	8	""	2	1	1	1	3	1	"APH"	2	""	5	2	2	2	2	1	2	2	2	1
901382	2	21	2	1	1	2	3	2	1	4	1	1	3	#NULL!	#NULL!	""	2	#NULL!	#NULL!	2	#NULL!	2	1	2	2	1	3	1	8	""	2	1	1	1	3	2	""	2	""	5	2	2	1	2	1	2	2	2	1
921084	2	28	2	1	1	2	3	2	1	4	1	1	3	#NULL!	#NULL!	""	2	#NULL!	#NULL!	2	#NULL!	2	1	4	2	1	4	1	8	""	2	1	1	1	3	2	""	2	""	5	2	2	1	2	1	2	2	2	1
921790	2	21	2	1	1	2	2	2	1	4	1	1	3	#NULL!	#NULL!	""	2	#NULL!	#NULL!	2	#NULL!	2	1	1	2	1	5	1	8	""	1	1	1	2	3	2	""	2	""	5	2	2	2	2	1	2	2	2	1
921787	2	30	2	1	1	2	3	2	3	2	2	2	1	1	3	""	2	#NULL!	#NULL!	2	#NULL!	2	1	4	2	1	4	1	10	""	2	1	1	1	1	2	""	2	""	5	2	2	2	2	1	2	2	2	1
920291	2	22	1	1	1	2	3	2	3	2	1	1	3	#NULL!	#NULL!	""	2	#NULL!	#NULL!	2	#NULL!	2	1	1	2	1	4	1	3	""	2	1	1	1	1	2	""	2	""	5	2	2	1	2	1	2	2	2	2
921725	2	26	2	1	1	1	3	2	1	4	2	2	1	1	11	""	2	#NULL!	#NULL!	2	#NULL!	2	1	4	2	1	4	1	8	""	2	1	1	1	3	2	""	2	""	5	2	2	2	2	1	2	2	2	1
910753	2	33	2	1	1	2	3	2	3	2	2	2	1	1	11	""	2	#NULL!	#NULL!	2	#NULL!	2	1	4	2	1	4	1	10	""	1	1	1	1	1	2	""	2	""	5	2	2	2	2	1	2	2	2	1
788734	2	23	2	1	1	2	3	2	3	2	2	2	1	1	6	""	2	#NULL!	#NULL!	2	#NULL!	2	1	4	2	1	4	1	10	""	2	1	1	1	1	2	""	2	""	5	2	2	2	2	1	2	2	2	1
921023	2	26	2	1	1	2	3	2	1	4	1	1	3	#NULL!	#NULL!	""	2	#NULL!	#NULL!	2	#NULL!	2	1	1	2	1	4	1	2	""	2	1	2	1	1	2	""	2	""	5	2	2	1	2	1	2	2	2	1
919881	2	20	2	1	1	2	3	2	1	4	1	1	3	#NULL!	#NULL!	""	2	#NULL!	#NULL!	2	#NULL!	2	1	2	1	#NULL!	#NULL!	1	11	""	2	1	1	1	1	2	""	2	""	5	2	2	1	2	1	1	1	1	1
895296	2	25	2	1	1	2	3	2	3	2	1	1	3	#NULL!	#NULL!	""	2	#NULL!	#NULL!	2	#NULL!	2	1	2	2	2	4	1	8	""	2	2	1	1	3	1	"preeclampsia"	2	""	5	2	2	2	2	1	2	2	2	1
919330	2	20	2	1	1	2	3	2	1	4	1	1	3	#NULL!	#NULL!	""	2	#NULL!	#NULL!	2	#NULL!	2	1	1	2	1	5	1	8	""	2	2	1	1	3	1	"oligohydramniosis"	2	""	5	2	2	2	2	1	2	2	2	1
918058	2	33	1	1	1	2	2	1	1	4	2	2	1	2	11	""	2	#NULL!	#NULL!	2	#NULL!	2	1	4	2	2	3	1	12	"2 CD scar in labor"	2	1	1	1	1	2	""	2	""	5	2	2	2	2	1	2	2	2	2
919282	2	28	2	1	1	2	2	2	1	4	2	2	2	#NULL!	#NULL!	""	2	#NULL!	#NULL!	2	#NULL!	2	1	1	2	1	5	1	2	""	2	2	2	1	2	2	""	2	""	5	2	2	1	2	1	2	2	2	1
915061	2	40	1	1	1	2	2	1	1	4	3	3	1	1	11	""	2	#NULL!	#NULL!	2	#NULL!	2	1	1	1	#NULL!	#NULL!	1	2	""	2	2	2	1	1	2	""	2	""	5	2	2	1	2	1	2	2	2	1
500856	2	40	2	1	1	2	2	2	3	2	3	3	1	1	3	""	2	#NULL!	#NULL!	2	#NULL!	2	1	4	2	2	4	1	10	""	2	2	1	1	1	2	""	2	""	5	2	2	1	2	1	2	2	2	1
882069	2	24	2	1	1	2	3	2	3	1	1	1	3	#NULL!	#NULL!	""	2	#NULL!	#NULL!	2	#NULL!	2	1	1	2	1	6	1	8	""	2	2	1	2	3	1	"postterm pregnancy"	2	""	2	2	2	1	2	1	2	2	2	1
911596	2	23	2	1	1	2	3	2	1	4	1	1	3	#NULL!	#NULL!	""	2	#NULL!	#NULL!	2	#NULL!	2	1	2	2	1	4	1	5	""	2	1	1	2	1	2	""	2	""	1	2	2	1	2	1	2	2	2	1
910956	2	20	2	1	1	2	2	2	2	1	1	1	3	#NULL!	#NULL!	""	2	#NULL!	#NULL!	2	#NULL!	2	1	2	2	1	4	1	2	""	2	2	2	1	1	2	""	2	""	5	2	2	2	2	1	2	2	2	1
910699	2	27	2	1	2	2	3	2	3	2	1	1	2	#NULL!	#NULL!	""	2	#NULL!	#NULL!	2	#NULL!	2	1	2	2	1	4	1	8	""	2	1	1	1	3	2	""	2	""	5	2	2	2	2	1	2	2	2	1
912905	2	18	2	1	1	1	3	2	1	4	1	1	3	#NULL!	#NULL!	""	2	#NULL!	#NULL!	2	#NULL!	2	1	2	2	1	4	1	5	""	2	2	1	2	1	2	""	2	""	1	2	2	1	2	1	2	2	2	1
914974	2	28	2	1	1	2	2	2	1	4	2	2	2	#NULL!	#NULL!	""	1	1	#NULL!	2	#NULL!	2	1	1	2	1	4	1	2	""	2	2	2	1	1	2	""	2	""	5	2	2	1	2	1	2	2	2	1
912276	2	24	2	1	1	2	2	2	1	4	1	1	3	#NULL!	#NULL!	""	2	#NULL!	#NULL!	2	#NULL!	2	1	2	2	1	4	1	8	""	1	1	1	1	3	2	""	2	""	5	2	2	1	2	1	2	2	2	1
855827	2	26	2	1	1	2	3	2	2	2	2	2	2	#NULL!	#NULL!	""	2	#NULL!	#NULL!	2	#NULL!	2	1	1	2	1	4	1	8	""	2	1	1	1	3	2	""	2	""	5	2	2	1	2	1	2	2	2	1
637586	2	27	2	1	1	1	3	2	1	4	1	1	3	#NULL!	#NULL!	""	2	#NULL!	#NULL!	2	#NULL!	2	1	2	2	1	4	1	8	""	2	1	1	2	3	2	""	2	""	5	2	2	1	2	1	2	2	2	1
913562	2	38	2	1	1	2	3	2	2	2	3	3	2	#NULL!	#NULL!	""	1	1	#NULL!	2	#NULL!	2	1	2	2	1	4	2	3	""	2	1	2	1	1	2	""	2	""	5	2	2	1	2	1	2	2	2	2
912663	2	24	2	1	1	2	3	2	1	4	2	2	1	1	6	""	2	#NULL!	#NULL!	2	#NULL!	2	1	1	2	1	4	1	10	""	2	1	1	1	1	2	""	2	""	5	2	2	2	2	1	2	2	2	1
910118	2	25	2	1	1	2	2	2	1	4	2	2	2	#NULL!	#NULL!	""	2	#NULL!	#NULL!	2	#NULL!	2	1	2	2	1	6	1	4	""	2	2	1	1	2	1	"postterm pregnancy"	2	""	5	4	2	2	2	1	1	1	1	1
820907	2	32	2	1	1	2	3	2	1	4	2	2	2	#NULL!	#NULL!	""	2	#NULL!	#NULL!	2	#NULL!	2	1	2	2	1	4	1	10	""	2	1	1	1	1	2	""	2	""	5	2	2	2	2	1	2	2	2	1
919791	2	27	2	1	1	2	3	2	1	4	1	1	3	#NULL!	#NULL!	""	2	#NULL!	#NULL!	2	#NULL!	2	1	1	2	1	4	1	8	""	2	2	2	1	2	2	""	2	""	3	4	2	2	2	1	1	1	1	1
892977	2	29	2	1	1	1	2	2	1	4	1	1	3	#NULL!	#NULL!	""	1	1	#NULL!	2	#NULL!	2	1	4	2	1	5	1	2	""	2	2	2	2	1	1	"PROM"	2	""	2	2	2	1	2	1	2	2	2	1
907838	2	25	2	1	1	2	3	2	3	1	2	2	2	#NULL!	#NULL!	""	2	#NULL!	#NULL!	2	#NULL!	2	1	2	2	1	6	1	11	""	2	1	1	1	1	2	""	2	""	5	2	1	1	2	1	2	2	2	1
480710	2	36	2	1	1	2	3	2	1	4	2	2	2	#NULL!	#NULL!	""	2	#NULL!	#NULL!	2	#NULL!	2	1	4	2	1	3	1	1	""	2	2	1	1	1	2	""	2	""	5	2	2	2	2	1	2	2	2	1
919019	2	28	2	1	1	2	2	2	1	4	1	1	3	#NULL!	#NULL!	""	2	#NULL!	#NULL!	2	#NULL!	2	1	1	2	1	3	1	8	""	2	1	1	2	3	2	""	2	""	5	2	2	1	2	1	1	1	1	1
910692	2	26	1	1	1	2	2	2	1	4	2	2	1	1	6	""	2	#NULL!	#NULL!	2	#NULL!	2	1	4	2	1	5	1	8	""	2	2	1	2	2	2	""	2	""	2	2	2	1	2	1	2	2	2	1
911147	2	19	2	1	1	2	2	2	1	4	1	1	3	#NULL!	#NULL!	""	2	#NULL!	#NULL!	2	#NULL!	2	1	1	2	2	4	1	3	""	2	1	1	1	1	1	"APH"	2	""	5	2	2	1	2	1	2	2	2	2
913350	2	35	1	1	1	2	3	2	2	1	3	3	1	1	11	""	2	#NULL!	#NULL!	2	#NULL!	2	1	1	2	1	3	1	10	""	2	1	1	1	3	2	""	2	""	5	2	2	1	2	1	2	2	2	3
465255	2	32	2	1	1	2	1	2	1	4	2	2	1	1	3	""	1	1	#NULL!	2	#NULL!	2	1	1	2	1	4	1	10	""	1	1	2	2	1	2	""	2	""	5	2	2	1	2	1	2	2	2	1
475623	2	25	2	1	1	2	1	2	1	4	2	2	2	#NULL!	#NULL!	""	2	#NULL!	#NULL!	2	#NULL!	2	1	1	2	1	4	1	3	""	2	1	1	1	1	2	""	2	""	5	2	2	1	2	1	2	2	2	2
271885	2	25	2	1	1	2	3	2	1	4	2	1	3	#NULL!	#NULL!	""	1	1	#NULL!	2	#NULL!	2	1	2	1	#NULL!	#NULL!	1	8	""	1	1	1	1	1	2	""	2	""	5	2	2	2	2	1	2	2	2	1
472202	2	32	2	1	1	2	2	2	1	4	1	1	3	#NULL!	#NULL!	""	2	#NULL!	#NULL!	2	#NULL!	2	1	4	2	1	3	1	8	""	2	1	1	1	1	2	""	2	""	5	2	2	1	2	1	2	2	2	1
788757	2	29	2	1	1	2	2	2	2	2	3	1	3	#NULL!	#NULL!	""	1	1	#NULL!	2	#NULL!	2	1	2	2	1	5	1	8	""	1	1	1	1	3	2	""	2	""	5	2	2	1	2	1	2	2	2	1
473671	2	30	2	1	1	2	2	2	1	4	2	2	2	#NULL!	#NULL!	""	2	#NULL!	#NULL!	2	#NULL!	2	1	2	1	#NULL!	#NULL!	1	8	""	2	2	1	2	3	1	"chorioaminitis"	1	"RVI"	1	2	2	1	1	1	2	1	1	1
958606	2	22	2	1	1	2	2	2	2	2	1	1	2	#NULL!	#NULL!	""	2	#NULL!	#NULL!	2	#NULL!	2	1	2	2	1	5	1	8	""	2	2	1	1	2	2	""	2	""	5	2	2	1	2	1	2	2	2	1
474627	2	19	2	1	1	2	2	2	1	4	1	1	3	#NULL!	#NULL!	""	2	#NULL!	#NULL!	2	#NULL!	2	1	2	2	1	5	1	8	""	2	2	2	1	2	2	""	2	""	5	4	2	1	2	1	2	2	2	1
472335	2	26	2	1	1	2	2	2	1	4	1	1	3	#NULL!	#NULL!	""	2	#NULL!	#NULL!	2	#NULL!	2	1	2	1	#NULL!	#NULL!	1	1	""	1	1	1	1	1	2	""	2	""	5	2	2	1	2	1	2	2	2	1
473837	2	24	2	1	1	2	3	2	1	4	1	1	3	#NULL!	#NULL!	""	2	#NULL!	#NULL!	2	#NULL!	2	1	1	2	1	3	1	8	""	2	1	1	1	2	2	""	2	""	5	2	2	1	2	1	2	2	2	1
473952	2	22	2	1	1	2	3	2	1	4	1	1	2	#NULL!	#NULL!	""	2	#NULL!	#NULL!	2	#NULL!	2	1	1	1	#NULL!	#NULL!	1	8	""	2	2	1	1	2	2	""	2	""	5	4	2	1	2	1	2	2	2	1
474148	2	26	2	1	1	2	2	2	2	2	1	1	3	#NULL!	#NULL!	""	2	#NULL!	#NULL!	2	#NULL!	2	1	1	2	1	4	1	8	""	2	2	2	1	3	1	"preeclampsia"	2	""	2	2	2	1	2	1	2	2	2	1
471500	2	19	1	1	1	2	2	2	1	4	1	1	2	#NULL!	#NULL!	""	2	#NULL!	#NULL!	2	#NULL!	2	1	1	2	1	3	1	5	""	2	2	1	1	1	1	"preeclampsia"	2	""	1	4	2	1	2	1	2	2	2	1
470654	2	35	2	1	1	2	2	1	1	4	2	2	2	#NULL!	#NULL!	""	2	#NULL!	#NULL!	2	#NULL!	2	1	2	2	1	3	1	3	""	2	1	1	2	1	1	"PROM"	2	""	5	2	2	1	2	1	2	2	2	2
448561	2	38	2	1	1	2	3	2	1	4	3	3	1	1	7	""	2	#NULL!	#NULL!	2	#NULL!	2	1	2	1	#NULL!	#NULL!	1	10	""	2	1	1	1	1	2	""	2	""	5	2	2	1	2	1	2	2	2	1
963503	2	30	2	1	1	2	3	2	1	4	2	2	1	1	3	""	2	#NULL!	#NULL!	2	#NULL!	2	1	2	1	#NULL!	#NULL!	1	8	""	2	1	1	1	3	2	""	2	""	5	2	2	1	2	1	2	2	2	1
460877	2	25	2	1	1	2	2	2	2	1	1	1	3	#NULL!	#NULL!	""	2	#NULL!	#NULL!	2	#NULL!	2	1	1	2	1	4	1	6	""	1	1	1	1	1	2	""	2	""	5	2	2	2	2	1	2	2	2	1
475218	2	30	2	1	1	2	2	2	1	2	2	2	1	1	1	""	2	#NULL!	#NULL!	2	#NULL!	2	1	2	2	1	4	1	10	""	1	1	1	1	1	2	""	2	""	5	2	2	1	2	1	2	2	2	1
475198	2	20	1	1	1	1	2	1	1	4	1	1	3	#NULL!	#NULL!	""	2	#NULL!	#NULL!	2	#NULL!	2	1	1	2	1	4	1	8	""	1	1	1	1	3	2	""	2	""	5	2	2	1	2	1	2	2	2	1
289187	2	26	2	1	1	2	2	2	3	2	1	1	3	#NULL!	#NULL!	""	2	#NULL!	#NULL!	2	#NULL!	2	1	4	2	1	5	1	11	""	2	1	1	1	1	2	""	2	""	5	2	2	1	2	1	2	2	2	1
475114	2	27	2	1	1	2	3	2	1	4	2	2	1	1	11	""	1	1	#NULL!	2	#NULL!	2	1	1	2	1	4	1	10	""	2	1	1	1	1	2	""	2	""	5	2	2	1	2	1	2	2	2	1
474964	2	28	2	1	1	2	2	2	2	2	2	1	3	#NULL!	#NULL!	""	1	1	#NULL!	2	#NULL!	2	1	2	2	1	4	1	9	""	2	1	1	2	1	2	""	2	""	2	2	2	1	2	1	2	2	2	1
475101	2	37	2	1	1	2	2	2	1	4	3	3	2	#NULL!	#NULL!	""	2	#NULL!	#NULL!	2	#NULL!	2	1	2	2	1	4	1	3	""	1	1	1	1	1	2	""	2	""	5	2	2	1	2	1	2	2	2	2
455117	2	18	2	1	1	2	3	2	1	4	1	1	3	#NULL!	#NULL!	""	2	#NULL!	#NULL!	2	#NULL!	2	1	2	2	1	4	1	1	""	2	2	1	1	1	2	""	2	""	5	2	2	1	2	1	2	2	2	1
32128	2	31	2	1	1	2	3	2	1	4	1	1	3	#NULL!	#NULL!	""	2	#NULL!	#NULL!	2	#NULL!	2	1	2	2	1	5	1	8	""	2	2	1	1	2	2	""	2	""	5	4	2	1	2	1	2	2	2	1
406389	2	22	2	1	1	2	3	2	1	4	1	1	3	#NULL!	#NULL!	""	2	#NULL!	#NULL!	2	#NULL!	2	1	2	2	1	2	2	3	""	2	1	1	2	1	1	"multiple pregnancy"	2	""	5	2	2	1	2	1	2	2	2	2
474701	2	35	1	1	1	2	3	2	1	4	2	2	1	1	6	""	2	#NULL!	#NULL!	2	#NULL!	2	1	1	2	1	3	1	10	""	#NULL!	2	1	1	1	2	""	2	""	5	2	2	1	2	1	2	2	2	1
878213	2	25	2	1	1	2	3	2	1	4	2	2	1	1	6	""	2	#NULL!	#NULL!	2	#NULL!	2	1	2	2	1	3	1	10	""	#NULL!	#NULL!	1	1	1	2	""	2	""	5	2	2	1	2	1	2	2	2	1
406437	2	20	1	1	1	1	2	2	1	4	1	1	3	#NULL!	#NULL!	""	2	#NULL!	#NULL!	2	#NULL!	2	1	1	2	1	5	1	2	""	2	2	2	1	1	2	""	2	""	5	2	2	1	2	1	2	2	2	1
472236	2	25	2	1	1	2	3	2	1	4	1	1	3	#NULL!	#NULL!	""	2	#NULL!	#NULL!	2	#NULL!	2	1	1	2	1	6	1	8	""	1	1	1	1	3	1	"postterm pregnancy"	2	""	1	2	2	1	2	1	2	2	2	1
475173	2	40	1	1	1	2	2	1	1	4	3	3	2	#NULL!	#NULL!	""	2	#NULL!	#NULL!	2	#NULL!	2	1	1	1	#NULL!	#NULL!	1	4	""	1	1	1	1	2	2	""	2	""	5	4	2	1	2	1	2	2	2	1
499011	2	30	2	1	1	2	2	2	1	4	3	3	2	#NULL!	#NULL!	""	1	1	#NULL!	2	#NULL!	2	1	4	2	1	4	1	3	""	2	1	1	1	1	2	""	2	""	5	2	2	1	2	1	2	2	2	2
996699	2	23	1	1	1	2	2	2	1	4	2	2	1	1	11	""	2	#NULL!	#NULL!	2	#NULL!	2	1	1	1	#NULL!	#NULL!	1	8	""	2	2	1	1	3	2	""	2	""	5	2	2	1	2	1	2	2	2	1
499658	2	24	2	1	1	2	2	2	1	4	1	1	3	#NULL!	#NULL!	""	2	#NULL!	#NULL!	2	#NULL!	2	1	4	2	1	5	1	4	""	2	2	1	1	2	2	""	2	""	5	2	2	1	2	1	2	2	2	1
499626	2	23	2	1	1	2	2	2	2	1	1	1	3	#NULL!	#NULL!	""	2	#NULL!	#NULL!	2	#NULL!	2	1	1	2	1	5	1	8	""	2	2	1	1	2	2	""	2	""	1	2	2	1	2	1	2	2	2	1
499859	2	18	2	1	1	2	2	2	1	4	1	1	3	#NULL!	#NULL!	""	2	#NULL!	#NULL!	2	#NULL!	2	1	1	2	1	6	1	2	""	2	2	2	1	1	1	"preeclampsia"	2	""	5	2	2	1	2	1	2	2	2	1
499846	2	35	2	1	1	2	2	2	1	4	1	1	3	#NULL!	#NULL!	""	2	#NULL!	#NULL!	2	#NULL!	2	1	1	2	1	4	1	8	""	2	2	1	2	3	1	"chorioaminitis"	2	""	5	2	2	1	1	1	2	1	1	1
277818	2	29	2	1	1	2	1	2	1	4	2	2	1	1	11	""	2	#NULL!	#NULL!	2	#NULL!	2	1	2	2	1	5	1	2	""	2	2	2	1	1	2	""	2	""	5	2	2	1	2	1	2	2	2	3
878397	2	30	1	1	1	2	1	2	1	4	2	2	1	1	11	""	2	#NULL!	#NULL!	2	#NULL!	2	1	1	2	1	4	1	10	""	2	2	1	1	1	2	""	2	""	5	2	2	1	2	1	2	2	2	1
498842	2	25	1	1	1	2	1	2	1	4	2	2	1	1	11	""	2	#NULL!	#NULL!	2	#NULL!	2	1	1	2	1	4	1	10	""	2	2	2	1	1	2	""	2	""	5	2	2	1	2	1	2	2	2	1
438140	2	25	2	1	1	2	2	2	1	4	1	1	3	#NULL!	#NULL!	""	2	#NULL!	#NULL!	2	#NULL!	2	1	2	2	1	4	1	5	""	2	2	1	1	1	1	"preeclampsia"	2	""	1	2	2	1	2	1	2	2	2	1
498787	2	25	2	1	1	2	2	2	1	4	1	1	3	#NULL!	#NULL!	""	2	#NULL!	#NULL!	2	#NULL!	2	1	1	2	1	5	1	8	""	2	1	1	1	3	2	""	2	""	5	2	2	1	2	1	2	2	2	1
498364	2	33	2	1	1	2	1	2	3	2	2	2	1	1	4	""	2	#NULL!	#NULL!	2	#NULL!	2	1	4	1	#NULL!	#NULL!	1	10	""	2	2	1	1	1	2	""	2	""	5	2	2	1	2	1	2	2	2	1
498909	2	22	2	1	1	2	1	2	1	4	1	1	3	#NULL!	#NULL!	""	2	#NULL!	#NULL!	2	#NULL!	2	1	4	2	1	5	1	8	""	2	2	1	1	2	2	""	2	""	5	2	2	1	2	1	2	2	2	1
498929	2	35	1	1	1	2	2	2	1	4	3	3	2	#NULL!	#NULL!	""	1	1	#NULL!	2	#NULL!	2	1	1	2	1	4	1	3	""	2	1	1	1	1	2	""	2	""	5	2	2	1	2	1	2	2	2	1
472524	2	25	2	1	1	2	1	2	1	4	2	2	1	1	11	""	2	#NULL!	#NULL!	2	#NULL!	2	1	2	2	1	4	1	10	""	2	1	1	1	1	2	""	2	""	5	2	2	1	2	1	2	2	2	1
498893	2	29	1	1	1	1	2	2	1	4	1	1	3	#NULL!	#NULL!	""	2	#NULL!	#NULL!	2	#NULL!	2	1	1	2	1	2	1	8	""	2	2	1	1	2	1	"preeclampsia"	2	""	1	4	2	1	2	1	2	2	2	1
498306	2	24	2	1	1	2	2	2	1	4	1	1	3	#NULL!	#NULL!	""	2	#NULL!	#NULL!	2	#NULL!	2	1	4	2	1	6	1	5	""	2	2	1	1	1	1	"postterm pregnancy"	2	""	1	2	2	1	2	1	2	2	2	1
498382	2	20	2	1	1	1	2	2	3	1	1	1	3	#NULL!	#NULL!	""	2	#NULL!	#NULL!	2	#NULL!	2	1	4	1	#NULL!	#NULL!	1	2	""	2	2	2	1	1	2	""	2	""	5	4	2	1	2	1	2	2	2	1
494525	2	34	2	1	1	2	1	2	3	1	2	2	1	1	6	""	2	#NULL!	#NULL!	2	#NULL!	2	1	2	2	1	4	1	10	""	2	2	2	1	1	2	""	2	""	5	2	2	1	2	1	2	2	2	1
497847	2	26	2	1	1	2	2	2	3	1	2	2	2	#NULL!	#NULL!	""	2	#NULL!	#NULL!	2	#NULL!	2	1	1	2	1	3	1	8	""	2	1	1	1	3	1	"APH"	2	""	5	2	2	1	2	1	2	2	2	1
392394	2	25	2	1	1	2	2	2	1	4	2	2	1	1	11	""	2	#NULL!	#NULL!	2	#NULL!	2	1	4	2	1	4	1	10	""	2	2	1	1	1	2	""	2	""	5	2	2	1	2	1	2	2	2	1
490918	2	26	2	1	1	2	2	2	1	4	2	2	2	#NULL!	#NULL!	""	2	#NULL!	#NULL!	2	#NULL!	2	1	2	2	1	3	1	8	""	2	1	1	1	3	1	"preeclampsia"	2	""	1	2	2	1	2	1	2	2	2	1
967125	2	26	2	1	1	2	3	2	1	4	2	2	1	1	6	""	2	#NULL!	#NULL!	2	#NULL!	2	1	2	2	1	4	1	10	""	2	2	1	1	3	2	""	2	""	5	2	2	1	2	1	2	2	2	1
452541	2	25	2	1	1	2	3	2	3	1	1	1	3	#NULL!	#NULL!	""	2	#NULL!	#NULL!	2	#NULL!	2	1	2	2	1	6	1	8	""	2	1	1	1	3	1	"postterm pregnancy"	2	""	5	2	2	1	2	1	2	2	2	1
497763	2	27	2	1	1	2	1	2	3	2	1	1	2	#NULL!	#NULL!	""	2	#NULL!	#NULL!	2	#NULL!	2	1	4	2	1	5	1	2	""	2	2	2	2	1	2	""	2	""	2	2	2	1	2	1	2	2	2	1
810649	2	33	2	1	1	2	1	2	1	4	2	2	1	1	8	""	2	#NULL!	#NULL!	2	#NULL!	2	1	2	2	1	4	1	6	""	2	2	2	1	2	2	""	2	""	5	4	2	1	2	1	2	2	2	1
497658	2	24	2	1	1	2	2	2	2	1	1	1	2	#NULL!	#NULL!	""	2	#NULL!	#NULL!	2	#NULL!	2	1	4	2	1	6	1	8	""	2	1	1	1	2	1	"postterm pregnancy"	2	""	5	2	2	1	2	1	2	2	2	1
497620	2	32	2	1	1	2	2	2	3	1	1	1	3	#NULL!	#NULL!	""	2	#NULL!	#NULL!	2	#NULL!	2	1	4	2	1	4	1	2	""	2	2	2	1	1	2	""	2	""	5	2	2	1	2	1	2	2	2	1
497387	2	25	2	1	1	2	2	2	1	4	2	2	2	#NULL!	#NULL!	""	2	#NULL!	#NULL!	2	#NULL!	2	1	2	2	1	4	1	1	""	2	2	1	1	1	2	""	2	""	5	2	2	1	2	1	2	2	2	1
996962	2	30	1	1	1	1	2	2	1	4	2	2	1	1	11	""	2	#NULL!	#NULL!	2	#NULL!	2	1	1	2	1	3	1	10	""	2	2	1	1	1	2	""	2	""	5	4	2	1	2	1	2	2	2	1
495766	2	23	2	1	1	2	2	2	3	2	2	2	2	#NULL!	#NULL!	""	2	#NULL!	#NULL!	2	#NULL!	2	1	4	2	1	4	1	8	""	2	1	1	1	3	2	""	2	""	5	2	2	1	2	1	2	2	2	1
477161	2	22	2	1	1	2	1	2	3	1	2	2	2	#NULL!	#NULL!	""	2	#NULL!	#NULL!	2	#NULL!	2	1	1	2	1	4	1	8	""	2	2	1	2	3	2	""	2	""	5	2	2	1	2	1	2	2	2	1
497385	2	38	1	1	1	2	1	2	1	4	2	2	2	#NULL!	#NULL!	""	1	1	#NULL!	2	#NULL!	2	1	1	2	1	4	1	8	""	2	1	1	1	3	2	""	2	""	5	2	2	1	2	1	2	2	2	1
496123	2	27	2	1	1	2	1	2	1	4	1	1	3	#NULL!	#NULL!	""	2	#NULL!	#NULL!	2	#NULL!	2	1	2	2	1	5	1	1	""	2	2	1	1	3	2	""	2	""	2	2	2	1	2	1	2	2	2	1
497705	2	21	2	1	1	1	1	2	1	4	1	1	2	#NULL!	#NULL!	""	2	#NULL!	#NULL!	2	#NULL!	2	1	1	2	1	5	1	8	""	2	2	1	1	2	2	""	2	""	5	2	2	1	2	1	2	2	2	1
496923	2	21	2	1	1	2	2	2	1	4	1	1	3	#NULL!	#NULL!	""	2	#NULL!	#NULL!	2	#NULL!	2	1	2	1	#NULL!	#NULL!	1	8	""	2	2	1	2	2	2	""	2	""	1	4	2	1	2	1	2	2	2	1
151108	2	30	2	1	1	2	2	2	3	1	2	2	1	1	3	""	2	#NULL!	#NULL!	2	#NULL!	2	1	2	2	1	3	1	10	""	2	2	1	1	1	2	""	2	""	5	2	2	1	2	1	2	2	2	1
383382	2	19	2	1	1	2	1	2	3	1	1	1	3	#NULL!	#NULL!	""	2	#NULL!	#NULL!	2	#NULL!	2	1	2	2	1	4	1	5	""	2	1	1	1	1	2	""	2	""	1	2	2	1	2	1	2	2	2	1
911331	2	25	2	1	1	2	3	2	2	2	2	2	1	1	6	""	2	#NULL!	#NULL!	2	#NULL!	2	1	2	2	1	3	1	10	""	2	2	1	1	1	2	""	2	""	5	2	2	1	2	1	2	2	2	1
496471	2	25	2	1	1	2	3	2	2	1	1	1	3	#NULL!	#NULL!	""	2	#NULL!	#NULL!	2	#NULL!	2	1	1	1	#NULL!	#NULL!	1	3	""	2	1	1	1	1	2	""	2	""	5	2	2	1	2	1	2	2	2	2
496783	2	26	2	1	1	2	2	2	2	1	1	1	3	#NULL!	#NULL!	""	2	#NULL!	#NULL!	2	#NULL!	2	1	4	1	#NULL!	#NULL!	1	3	""	2	2	1	1	1	2	""	2	""	5	2	2	1	2	1	2	2	2	1
454093	2	36	2	1	1	2	1	2	1	4	3	3	2	#NULL!	#NULL!	""	2	#NULL!	#NULL!	2	#NULL!	2	1	1	1	#NULL!	#NULL!	1	8	""	2	2	1	1	2	1	"APH"	2	""	5	4	2	1	2	1	2	2	2	1
496743	2	24	1	1	1	2	2	2	1	4	2	2	2	#NULL!	#NULL!	""	2	#NULL!	#NULL!	2	#NULL!	2	1	1	2	1	4	1	4	""	2	2	1	1	2	2	""	2	""	5	4	2	1	2	1	2	2	2	1
496333	2	30	2	1	1	2	1	2	2	2	2	2	2	#NULL!	#NULL!	""	2	#NULL!	#NULL!	2	#NULL!	2	1	4	2	1	4	1	2	""	2	1	2	1	1	2	""	2	""	5	2	2	1	2	1	2	2	2	1
495720	2	27	2	1	2	2	1	2	3	2	1	1	2	#NULL!	#NULL!	""	2	#NULL!	#NULL!	2	#NULL!	2	1	4	1	#NULL!	#NULL!	1	11	""	2	1	1	1	1	2	""	2	""	5	2	2	1	2	1	1	2	2	1
496441	2	41	2	1	1	2	1	2	1	4	3	3	2	#NULL!	#NULL!	""	2	#NULL!	#NULL!	2	#NULL!	2	1	1	1	#NULL!	#NULL!	1	11	""	2	1	1	2	1	2	""	2	""	5	2	2	1	2	1	2	2	2	1
496484	2	23	2	1	1	2	2	2	2	1	1	1	3	#NULL!	#NULL!	""	2	#NULL!	#NULL!	2	#NULL!	2	1	4	2	1	4	1	8	""	2	2	1	2	3	2	""	2	""	5	2	2	1	2	1	2	2	2	1
976162	2	30	1	1	1	2	1	2	1	4	2	2	1	1	11	""	2	#NULL!	#NULL!	2	#NULL!	2	1	2	1	#NULL!	#NULL!	1	10	""	2	2	2	1	1	2	""	2	""	5	2	2	1	2	1	2	2	2	1
496407	2	24	2	1	1	2	2	2	1	4	2	2	1	1	11	""	2	#NULL!	#NULL!	2	#NULL!	2	1	2	2	1	5	1	10	""	2	1	1	1	1	2	""	2	""	5	2	2	1	2	1	2	2	2	1
496355	2	35	1	1	1	2	2	2	1	4	3	3	2	#NULL!	#NULL!	""	2	#NULL!	#NULL!	2	#NULL!	2	1	1	1	#NULL!	#NULL!	2	12	"conjoined twin"	2	2	1	1	1	1	"conjoined twin"	2	""	5	2	2	1	1	5	2	2	2	2
922725	2	28	2	1	1	2	3	2	2	2	1	1	3	#NULL!	#NULL!	""	2	#NULL!	#NULL!	2	#NULL!	2	1	2	2	1	4	1	11	""	2	2	1	1	1	2	""	2	""	5	2	2	1	2	1	2	2	2	1
909270	2	25	1	1	1	2	2	2	1	4	2	2	1	1	11	""	2	#NULL!	#NULL!	2	#NULL!	2	1	1	2	1	3	1	10	""	2	2	1	1	3	2	""	2	""	5	2	2	1	2	1	2	2	2	1
467230	2	36	2	1	1	2	1	2	1	4	3	3	2	#NULL!	#NULL!	""	2	#NULL!	#NULL!	2	#NULL!	2	1	2	2	1	3	1	3	""	1	1	1	1	1	2	""	2	""	5	2	2	1	2	1	2	2	2	2
31119	2	42	2	1	1	2	2	2	1	4	3	3	1	2	8	""	2	#NULL!	#NULL!	2	#NULL!	2	1	4	2	1	3	1	12	"2 CD scar in labor"	2	2	1	2	1	1	"chorioaminitis"	1	"DM"	5	2	2	1	1	1	2	1	1	1
479476	2	28	2	1	1	1	2	1	1	4	2	2	1	1	11	""	2	#NULL!	#NULL!	2	#NULL!	2	1	2	2	1	4	1	10	""	2	1	1	1	1	1	"preeclampsia"	2	""	5	4	2	1	2	1	2	2	2	1
974850	2	25	2	1	1	2	1	2	3	1	2	2	1	1	3	""	2	#NULL!	#NULL!	2	#NULL!	2	1	2	2	1	5	1	10	""	2	1	1	1	1	2	""	2	""	5	2	2	1	2	1	2	2	2	1
460545	2	38	2	1	1	2	1	2	1	4	2	2	1	2	7	""	2	#NULL!	#NULL!	2	#NULL!	2	1	2	2	1	3	1	12	"2 CD scar in labor"	2	2	1	1	1	2	""	2	""	5	2	2	1	2	1	2	2	2	1
479472	2	28	2	1	1	2	2	2	2	2	1	1	3	#NULL!	#NULL!	""	2	#NULL!	#NULL!	2	#NULL!	2	1	4	2	1	4	2	11	""	2	1	1	1	1	1	"multiple pregnancy"	2	""	5	2	2	1	2	1	2	2	2	1
475892	2	29	1	1	1	2	2	2	1	4	1	1	3	#NULL!	#NULL!	""	2	#NULL!	#NULL!	2	#NULL!	2	1	4	2	1	2	1	3	""	2	2	1	1	1	1	"preeclampsia"	2	""	5	2	2	1	2	1	2	2	2	2
479388	2	25	2	1	1	2	2	2	2	2	1	1	3	#NULL!	#NULL!	""	2	#NULL!	#NULL!	2	#NULL!	2	1	4	2	1	3	1	5	""	2	1	1	2	1	2	""	2	""	1	2	2	1	2	1	2	2	2	1
473522	2	27	2	1	1	2	1	2	1	4	1	1	3	#NULL!	#NULL!	""	2	#NULL!	#NULL!	2	#NULL!	2	1	4	2	1	5	1	2	""	2	2	2	2	1	2	""	2	""	5	2	2	1	2	1	2	2	2	1
479134	2	38	2	1	1	2	2	2	1	4	3	3	1	1	11	""	2	#NULL!	#NULL!	2	#NULL!	2	1	1	2	1	3	1	8	""	2	1	1	1	3	2	""	2	""	5	2	2	1	2	1	2	2	2	1
478633	2	23	2	1	1	1	2	2	2	2	1	1	3	#NULL!	#NULL!	""	2	#NULL!	#NULL!	2	#NULL!	2	1	2	2	1	6	1	8	""	1	1	1	1	3	1	"postterm pregnancy"	2	""	1	2	2	1	2	1	2	2	2	1
479340	2	18	1	1	1	2	2	2	1	4	1	1	3	#NULL!	#NULL!	""	2	#NULL!	#NULL!	2	#NULL!	2	1	1	2	1	3	1	2	""	2	1	2	1	1	2	""	2	""	5	2	2	1	2	1	2	2	2	1
777898	2	30	1	1	1	2	3	2	1	4	2	2	1	1	6	""	2	#NULL!	#NULL!	2	#NULL!	2	1	2	1	#NULL!	#NULL!	1	10	""	2	1	1	1	1	2	""	2	""	5	2	2	1	2	1	2	2	2	1
477181	2	33	2	1	1	2	1	2	2	2	2	2	1	1	4	""	2	#NULL!	#NULL!	2	#NULL!	2	1	4	2	1	4	1	10	""	2	1	1	1	1	2	""	2	""	5	2	2	1	2	1	2	2	2	1
476782	2	30	2	1	2	2	3	2	1	4	2	2	2	#NULL!	#NULL!	""	2	#NULL!	#NULL!	2	#NULL!	2	1	2	1	#NULL!	#NULL!	1	1	""	2	1	1	1	1	2	""	2	""	5	2	2	1	2	1	2	2	2	1
478672	2	26	2	1	2	2	1	2	2	2	1	1	3	#NULL!	#NULL!	""	2	#NULL!	#NULL!	2	#NULL!	2	1	4	2	1	6	1	8	""	2	1	1	2	3	1	"postterm pregnancy"	2	""	2	2	2	1	2	1	2	2	2	1
422122	2	25	2	1	1	2	3	2	2	1	2	2	2	#NULL!	#NULL!	""	2	#NULL!	#NULL!	2	#NULL!	2	1	1	2	1	3	1	4	""	2	2	2	1	2	2	""	2	""	5	4	2	1	2	1	2	2	2	1
454761	2	23	2	1	1	2	2	2	1	4	1	1	3	#NULL!	#NULL!	""	2	#NULL!	#NULL!	2	#NULL!	2	1	1	2	1	4	1	8	""	2	1	1	1	3	2	""	2	""	5	4	2	1	2	1	2	2	2	1
232911	2	24	2	1	1	2	3	2	1	4	2	2	1	1	11	""	2	#NULL!	#NULL!	2	#NULL!	2	1	2	2	1	3	1	10	""	2	1	1	1	1	2	""	2	""	5	2	2	1	2	1	2	2	2	1
110085	2	28	2	1	1	2	1	2	1	4	2	2	2	#NULL!	#NULL!	""	2	#NULL!	#NULL!	2	#NULL!	2	1	4	2	1	3	1	8	""	2	1	1	1	3	2	""	2	""	5	2	2	1	2	1	2	2	2	1
478360	2	33	2	1	1	2	2	2	2	2	1	1	3	#NULL!	#NULL!	""	2	#NULL!	#NULL!	2	#NULL!	2	1	4	2	1	4	1	3	""	2	1	2	2	1	2	""	2	""	5	2	2	1	2	1	2	2	2	1
448678	2	28	2	1	1	2	3	2	2	2	2	2	2	#NULL!	#NULL!	""	2	#NULL!	#NULL!	2	#NULL!	2	1	4	2	1	5	1	8	""	2	1	1	1	3	2	""	2	""	5	2	2	1	2	1	2	2	2	1
836851	2	33	2	1	1	1	3	2	2	2	2	2	1	1	11	""	2	#NULL!	#NULL!	2	#NULL!	2	1	4	2	1	4	1	10	""	2	1	1	1	1	2	""	2	""	5	2	2	1	2	1	2	2	2	1
776834	2	25	2	1	1	1	3	2	1	4	1	1	3	#NULL!	#NULL!	""	2	#NULL!	#NULL!	2	#NULL!	2	1	1	1	#NULL!	#NULL!	1	4	""	2	2	1	1	2	2	""	2	""	5	4	2	2	2	1	2	2	2	1
473744	2	20	2	1	1	2	2	2	1	4	2	2	2	#NULL!	#NULL!	""	2	#NULL!	#NULL!	2	#NULL!	2	1	2	1	#NULL!	#NULL!	2	3	""	2	2	1	1	1	2	""	2	""	5	2	2	2	2	1	2	2	2	1
833310	2	25	2	1	1	2	3	2	1	4	2	2	1	1	3	""	2	#NULL!	#NULL!	2	#NULL!	2	1	2	2	1	4	1	10	""	2	1	1	1	1	2	""	2	""	5	2	2	1	2	1	2	2	2	1
448096	2	23	2	1	1	2	1	2	1	4	2	2	1	1	3	""	2	#NULL!	#NULL!	2	#NULL!	2	1	2	2	1	3	1	10	""	2	1	1	1	1	2	""	2	""	5	2	2	1	2	1	2	2	2	1
477597	2	23	1	1	1	2	1	2	1	4	2	2	1	1	11	""	2	#NULL!	#NULL!	2	#NULL!	2	1	2	2	1	4	1	10	""	2	1	1	1	1	2	""	2	""	5	2	2	1	2	1	2	2	2	1
477550	2	28	2	1	1	2	2	2	1	4	1	1	3	#NULL!	#NULL!	""	2	#NULL!	#NULL!	2	#NULL!	2	1	2	2	1	3	1	8	""	2	2	1	1	2	2	""	2	""	5	4	2	1	2	1	2	2	2	1
477848	2	22	1	1	1	2	2	2	1	4	1	1	3	#NULL!	#NULL!	""	2	#NULL!	#NULL!	2	#NULL!	2	1	1	2	1	6	1	2	""	2	2	2	1	1	2	""	2	""	5	2	2	1	2	1	2	2	2	1
477786	2	30	2	1	1	2	1	2	2	2	2	2	1	1	11	""	2	#NULL!	#NULL!	2	#NULL!	2	1	2	2	1	3	1	10	""	2	1	1	1	1	2	""	2	""	5	2	2	1	2	1	2	2	2	1
477965	2	18	1	1	1	2	2	2	1	4	1	1	3	#NULL!	#NULL!	""	2	#NULL!	#NULL!	2	#NULL!	2	1	1	2	1	6	1	3	""	2	1	1	1	1	1	"postterm pregnancy"	2	""	5	2	2	2	2	1	2	2	2	2
212472	2	20	2	1	1	2	2	2	2	1	1	1	3	#NULL!	#NULL!	""	2	#NULL!	#NULL!	2	#NULL!	2	1	2	1	#NULL!	#NULL!	1	8	""	2	1	1	1	3	2	""	2	""	5	2	2	1	2	1	2	2	2	1
809349	2	26	2	1	1	2	1	2	1	4	2	2	1	1	6	""	2	#NULL!	#NULL!	2	#NULL!	2	1	2	2	1	4	1	10	""	2	1	1	1	1	2	""	2	""	5	2	2	1	2	1	2	2	2	1
477487	2	22	1	1	1	2	2	1	1	4	2	2	1	1	6	""	2	#NULL!	#NULL!	2	#NULL!	2	1	1	1	#NULL!	#NULL!	1	8	""	2	1	1	1	3	2	""	2	""	5	2	2	1	2	1	2	2	2	1
477557	2	25	1	1	1	2	2	1	1	4	3	3	2	#NULL!	#NULL!	""	2	#NULL!	#NULL!	2	#NULL!	2	1	1	1	#NULL!	#NULL!	1	1	""	2	2	1	2	4	1	"IUFD"	2	""	5	2	2	1	2	1	2	2	2	1
477550	2	28	2	1	1	2	3	2	1	4	1	1	3	#NULL!	#NULL!	""	2	#NULL!	#NULL!	2	#NULL!	2	1	2	2	1	3	1	8	""	2	2	1	1	2	2	""	2	""	5	4	2	1	2	1	2	2	2	1
477345	2	23	2	1	1	2	2	2	1	4	1	1	3	#NULL!	#NULL!	""	2	#NULL!	#NULL!	2	#NULL!	2	1	4	1	#NULL!	#NULL!	1	1	""	2	1	1	2	1	2	""	2	""	5	2	2	1	2	1	2	2	2	1
477598	2	28	2	1	1	2	2	1	1	4	3	3	2	#NULL!	#NULL!	""	2	#NULL!	#NULL!	2	#NULL!	2	1	1	1	#NULL!	#NULL!	1	8	""	2	2	1	1	3	1	"APH"	2	""	5	4	2	1	2	1	2	2	2	1
470916	2	21	2	1	1	2	1	2	1	4	2	2	1	1	6	""	2	#NULL!	#NULL!	2	#NULL!	2	1	1	2	1	3	1	8	""	2	1	1	1	3	2	""	2	""	5	2	2	1	2	1	2	2	2	1
257532	2	27	2	1	1	2	3	2	1	4	2	2	1	1	3	""	2	#NULL!	#NULL!	2	#NULL!	2	1	4	2	1	4	1	10	""	2	2	1	1	1	2	""	2	""	5	2	2	1	2	1	2	2	2	1
477546	2	25	2	1	1	1	2	2	1	4	1	1	3	#NULL!	#NULL!	""	2	#NULL!	#NULL!	2	#NULL!	2	1	2	1	#NULL!	#NULL!	1	3	""	2	1	1	1	1	2	""	2	""	5	2	2	1	2	1	2	2	2	2
476603	2	27	2	1	1	2	2	2	1	4	1	1	3	#NULL!	#NULL!	""	2	#NULL!	#NULL!	2	#NULL!	2	1	2	2	1	5	1	5	""	2	1	1	2	1	1	"postterm pregnancy"	2	""	1	2	2	1	2	1	2	2	2	1
477075	2	27	2	1	1	2	2	2	1	4	2	2	1	1	6	""	2	#NULL!	#NULL!	2	#NULL!	2	1	2	2	1	2	1	10	""	2	1	2	1	1	1	"preterm labor"	2	""	5	2	2	1	2	1	2	2	2	1
477063	2	32	2	1	1	2	2	2	1	4	2	2	1	1	11	""	2	#NULL!	#NULL!	2	#NULL!	2	1	4	2	1	6	1	10	""	2	1	1	1	1	2	""	2	""	5	2	2	1	2	1	2	2	2	1
266175	2	30	2	1	1	2	2	2	3	2	2	2	1	1	11	""	2	#NULL!	#NULL!	2	#NULL!	2	1	2	2	1	4	1	10	""	2	1	1	1	1	2	""	2	""	5	2	2	1	2	1	2	2	2	1
476610	2	27	2	1	1	2	2	2	3	1	1	1	3	#NULL!	#NULL!	""	2	#NULL!	#NULL!	2	#NULL!	2	1	4	2	1	5	1	8	""	2	1	1	1	3	2	""	2	""	5	2	2	1	2	1	2	2	2	1
458904	2	20	2	1	1	2	3	2	3	2	1	1	3	#NULL!	#NULL!	""	2	#NULL!	#NULL!	2	#NULL!	2	1	2	2	1	4	1	11	""	2	1	1	1	1	2	""	2	""	5	2	2	1	2	1	2	2	2	1
470639	2	28	2	1	1	2	3	2	2	2	2	2	2	#NULL!	#NULL!	""	2	#NULL!	#NULL!	2	#NULL!	2	1	2	2	1	4	1	6	""	2	2	1	2	1	2	""	2	""	5	2	2	1	2	1	2	2	2	1
476440	2	30	2	1	1	2	2	2	2	2	2	2	1	1	11	""	2	#NULL!	#NULL!	2	#NULL!	2	1	2	2	1	2	1	10	""	2	2	1	2	1	2	""	2	""	5	2	2	1	2	1	2	2	2	1
280186	2	30	2	1	1	2	3	2	3	1	2	2	1	1	11	""	2	#NULL!	#NULL!	2	#NULL!	2	1	2	2	1	3	1	10	""	2	2	1	1	1	2	""	2	""	5	2	2	1	2	1	2	2	2	1
476169	2	22	2	1	1	2	2	2	3	1	1	1	3	#NULL!	#NULL!	""	2	#NULL!	#NULL!	2	#NULL!	2	1	4	1	#NULL!	#NULL!	1	8	""	2	1	1	1	1	2	""	2	""	1	2	2	1	2	1	2	2	2	1
426967	2	28	2	1	1	2	3	2	3	2	1	1	3	#NULL!	#NULL!	""	2	#NULL!	#NULL!	2	#NULL!	2	1	2	2	1	5	1	8	""	2	2	1	2	2	1	"postterm pregnancy"	2	""	1	2	2	1	2	1	2	2	2	1
476255	2	27	2	1	1	2	2	2	3	1	1	1	3	#NULL!	#NULL!	""	2	#NULL!	#NULL!	2	#NULL!	2	1	4	2	1	4	1	3	""	2	1	1	1	1	2	""	2	""	5	2	2	1	2	1	2	2	2	2
476352	2	34	2	1	1	2	2	2	1	4	2	2	2	#NULL!	#NULL!	""	2	#NULL!	#NULL!	2	#NULL!	2	1	2	2	1	3	2	8	""	2	1	1	1	3	1	"IUGR"	2	""	5	2	2	1	2	1	2	2	2	1
476573	2	25	2	1	1	2	2	2	2	2	1	1	3	#NULL!	#NULL!	""	2	#NULL!	#NULL!	2	#NULL!	2	1	4	2	1	4	1	1	""	2	1	1	1	1	2	""	2	""	5	2	2	1	2	1	2	2	2	1
469051	2	28	2	1	1	2	2	2	3	1	2	2	1	2	3	""	2	#NULL!	#NULL!	2	#NULL!	2	1	2	1	#NULL!	#NULL!	1	12	"2 CD scar in labor"	2	2	1	1	1	2	""	2	""	5	2	2	1	2	1	2	2	2	1
472115	2	38	1	1	1	2	2	1	1	4	2	2	1	1	11	""	2	#NULL!	#NULL!	2	#NULL!	2	1	2	2	1	3	1	10	""	2	1	1	1	1	2	""	2	""	5	2	2	1	2	1	2	2	2	1
473436	2	35	2	1	1	3	1	2	1	4	2	2	2	#NULL!	#NULL!	""	2	#NULL!	#NULL!	2	#NULL!	2	1	2	2	1	4	1	8	""	2	1	1	1	3	1	"APH"	2	""	5	2	2	1	2	1	2	2	2	1
473547	2	30	2	1	1	2	2	2	3	1	2	2	2	#NULL!	#NULL!	""	2	#NULL!	#NULL!	2	#NULL!	2	1	2	2	1	3	1	8	""	2	1	1	2	3	2	""	2	""	5	2	2	1	2	1	2	2	2	1
472134	2	29	2	1	1	2	3	2	2	2	2	2	1	2	11	""	2	#NULL!	#NULL!	2	#NULL!	2	1	4	2	1	4	1	12	"2 CD scar in labor"	2	2	1	1	1	2	""	2	""	5	2	2	1	2	1	2	2	2	1
472973	2	27	2	1	1	2	2	2	3	1	1	1	3	#NULL!	#NULL!	""	2	#NULL!	#NULL!	2	#NULL!	2	1	2	2	1	6	1	8	""	2	2	1	1	3	1	"postterm pregnancy"	2	""	5	2	2	1	2	1	2	2	2	1
781100	2	25	2	1	1	2	3	2	2	2	2	2	2	#NULL!	#NULL!	""	2	#NULL!	#NULL!	2	#NULL!	2	1	2	2	1	3	1	4	""	2	2	2	1	2	2	""	2	""	5	4	2	1	2	1	2	2	2	1
419340	2	25	2	1	1	2	2	2	1	4	2	2	1	1	11	""	2	#NULL!	#NULL!	2	#NULL!	2	1	2	2	1	5	1	10	""	2	1	1	1	1	1	"postterm pregnancy"	2	""	5	2	2	1	2	1	2	2	2	1
457080	2	28	2	1	1	2	3	2	1	4	2	2	2	#NULL!	#NULL!	""	2	#NULL!	#NULL!	2	#NULL!	2	1	2	2	1	4	1	8	""	2	1	1	1	3	2	""	2	""	2	2	2	1	2	1	2	2	2	1
475265	2	27	2	1	1	2	3	2	1	4	1	1	3	#NULL!	#NULL!	""	1	1	#NULL!	2	#NULL!	2	1	1	2	1	3	1	8	""	2	1	1	2	3	2	""	2	""	1	2	2	1	2	1	2	2	2	1
476203	2	36	1	1	1	2	2	2	1	4	3	3	2	#NULL!	#NULL!	""	2	#NULL!	#NULL!	2	#NULL!	2	1	1	2	1	3	1	8	""	2	2	2	1	2	2	""	2	""	5	4	2	1	2	1	2	2	2	1
475265	2	27	2	1	1	2	3	2	3	2	1	1	3	#NULL!	#NULL!	""	2	#NULL!	#NULL!	2	#NULL!	2	1	2	2	1	4	1	8	""	2	1	1	1	2	2	""	2	""	5	2	2	1	2	1	2	2	2	1
473994	2	19	1	1	1	2	1	2	1	4	1	1	3	#NULL!	#NULL!	""	2	#NULL!	#NULL!	2	#NULL!	2	1	1	2	1	4	1	4	""	2	2	1	1	1	2	""	2	""	5	4	2	1	2	1	2	2	2	1
476075	2	24	2	1	1	2	2	2	3	1	1	1	3	#NULL!	#NULL!	""	2	#NULL!	#NULL!	2	#NULL!	2	1	4	2	1	6	1	8	""	2	2	2	2	3	1	"postterm pregnancy"	2	""	5	2	2	1	2	1	2	2	2	1
476229	2	23	2	1	1	2	2	2	2	2	1	1	3	#NULL!	#NULL!	""	2	#NULL!	#NULL!	2	#NULL!	2	1	4	2	1	5	1	11	""	2	1	1	1	1	2	""	2	""	5	2	2	1	2	1	1	2	2	1
471688	2	22	2	1	1	2	3	2	2	2	1	1	3	#NULL!	#NULL!	""	2	#NULL!	#NULL!	2	#NULL!	2	1	2	2	1	3	1	5	""	2	1	1	2	1	1	"PROM"	2	""	5	2	2	1	2	1	2	2	2	1
475376	2	23	2	1	2	2	2	2	3	2	1	1	3	#NULL!	#NULL!	""	2	#NULL!	#NULL!	2	#NULL!	2	1	4	2	1	4	1	3	""	2	1	1	1	1	2	""	2	""	5	2	2	1	2	1	2	2	2	1
207224	2	27	2	1	1	2	1	2	2	1	1	1	3	#NULL!	#NULL!	""	2	#NULL!	#NULL!	2	#NULL!	2	1	2	2	1	5	1	8	""	2	2	1	2	3	2	""	2	""	2	2	2	1	2	1	2	2	2	1
809558	2	30	2	1	1	2	3	2	2	2	2	2	1	2	8	""	2	#NULL!	#NULL!	2	#NULL!	2	1	2	2	1	4	1	10	""	2	1	1	1	1	2	""	2	""	5	2	2	1	2	1	2	2	2	1
496189	2	22	2	1	1	2	1	2	2	2	1	1	3	#NULL!	#NULL!	""	2	#NULL!	#NULL!	2	#NULL!	2	1	1	1	#NULL!	#NULL!	1	8	""	2	1	1	1	3	2	""	2	""	5	2	2	1	2	1	2	2	2	1
494295	2	27	2	1	2	2	3	2	1	4	1	1	3	#NULL!	#NULL!	""	2	#NULL!	#NULL!	2	#NULL!	2	1	2	2	1	4	1	8	""	2	1	1	2	3	2	""	2	""	1	2	2	1	2	1	2	2	2	1
465526	2	24	2	1	1	2	1	2	1	4	2	2	2	#NULL!	#NULL!	""	2	#NULL!	#NULL!	2	#NULL!	2	1	2	2	1	4	1	8	""	2	1	1	1	3	2	""	2	""	1	2	2	1	2	1	2	2	2	1
495475	2	27	2	1	1	2	2	2	2	2	2	2	2	#NULL!	#NULL!	""	2	#NULL!	#NULL!	2	#NULL!	2	1	4	1	#NULL!	#NULL!	1	8	""	2	1	1	1	3	2	""	2	""	5	2	2	1	2	1	2	2	2	1
421791	2	20	2	1	1	2	1	2	1	4	2	2	1	1	6	""	2	#NULL!	#NULL!	2	#NULL!	2	1	2	2	1	5	1	10	""	2	2	1	1	1	2	""	2	""	5	2	2	1	2	1	2	2	2	1
495143	2	28	2	1	1	2	1	2	2	2	1	1	3	#NULL!	#NULL!	""	2	#NULL!	#NULL!	2	#NULL!	2	1	4	2	1	4	1	5	""	2	1	1	1	1	1	"PROM"	2	""	1	2	2	1	2	1	2	2	2	1
495627	2	25	1	1	1	2	2	2	1	4	2	2	1	1	11	""	2	#NULL!	#NULL!	2	#NULL!	2	1	1	2	1	4	1	10	""	2	2	1	1	1	2	""	2	""	5	2	2	1	2	1	2	2	2	1
495722	2	18	2	1	1	2	2	2	1	4	1	1	3	#NULL!	#NULL!	""	2	#NULL!	#NULL!	2	#NULL!	2	1	2	2	1	5	1	8	""	2	2	1	1	2	2	""	2	""	5	4	2	1	2	1	2	2	2	1
97080	2	37	2	1	1	2	2	2	1	4	3	3	2	#NULL!	#NULL!	""	2	#NULL!	#NULL!	2	#NULL!	2	1	2	2	1	3	2	3	""	2	2	1	1	1	2	""	2	""	5	2	2	1	2	1	2	2	2	2
496084	2	28	2	1	1	2	2	2	2	2	2	2	1	1	11	""	2	#NULL!	#NULL!	2	#NULL!	2	1	1	2	1	4	1	10	""	2	2	2	1	1	2	""	2	""	5	2	2	1	2	1	2	2	2	1
495029	2	37	2	1	1	2	2	2	3	2	2	2	1	1	3	""	2	#NULL!	#NULL!	2	#NULL!	2	1	4	2	1	3	1	10	""	2	1	1	1	1	2	""	2	""	5	2	2	1	2	1	2	2	2	1
494939	2	25	2	1	1	2	2	2	1	4	2	2	2	#NULL!	#NULL!	""	2	#NULL!	#NULL!	2	#NULL!	2	1	1	2	1	3	1	8	""	2	2	1	1	3	2	""	2	""	1	2	2	1	2	1	2	2	2	1
983138	2	22	2	1	1	2	2	2	1	4	2	2	1	1	6	""	2	#NULL!	#NULL!	2	#NULL!	2	1	2	2	1	5	1	10	""	2	1	1	1	1	2	""	2	""	5	2	2	1	2	1	2	2	2	1
495117	2	18	1	1	1	2	2	2	1	4	1	1	3	#NULL!	#NULL!	""	2	#NULL!	#NULL!	2	#NULL!	2	1	1	1	#NULL!	#NULL!	1	5	""	2	1	1	1	1	2	""	2	""	1	1	2	1	2	1	2	2	2	1
472685	2	26	2	1	1	2	1	2	1	4	1	1	3	#NULL!	#NULL!	""	2	#NULL!	#NULL!	2	#NULL!	2	1	2	2	1	5	1	8	""	2	1	1	1	3	2	""	2	""	5	2	2	1	2	1	2	2	2	1
34457	2	27	2	1	1	2	2	2	1	4	2	2	2	#NULL!	#NULL!	""	2	#NULL!	#NULL!	2	#NULL!	2	1	1	2	1	5	1	11	""	2	1	1	1	1	2	""	2	""	5	2	2	1	2	1	1	2	2	1
862495	2	35	2	1	1	2	2	2	2	3	2	2	2	#NULL!	#NULL!	""	2	#NULL!	#NULL!	2	#NULL!	2	1	4	2	1	6	1	8	""	2	2	1	1	2	1	"postterm pregnancy"	2	""	2	2	2	1	2	1	1	2	2	1
816803	2	35	2	1	1	2	1	2	2	1	2	2	1	1	11	""	2	#NULL!	#NULL!	2	#NULL!	2	1	2	2	1	3	1	10	""	2	1	1	1	1	1	"preeclampsia"	2	""	5	2	2	1	2	1	2	2	2	1
494831	2	35	2	1	1	2	2	2	2	2	2	2	2	#NULL!	#NULL!	""	2	#NULL!	#NULL!	2	#NULL!	2	1	4	1	#NULL!	#NULL!	1	2	""	2	2	2	2	1	2	""	2	""	5	2	2	1	2	1	2	2	2	1
494830	2	23	2	1	1	2	2	2	1	4	1	1	3	#NULL!	#NULL!	""	2	#NULL!	#NULL!	2	#NULL!	2	1	1	2	1	6	1	8	""	2	2	1	1	2	2	""	2	""	5	2	2	1	2	1	2	2	2	1
862796	2	26	2	1	2	2	3	2	1	4	1	1	3	#NULL!	#NULL!	""	2	#NULL!	#NULL!	2	#NULL!	2	1	1	2	1	4	1	5	""	2	1	1	1	1	2	""	2	""	1	2	2	1	2	1	2	2	2	1
462378	2	21	2	1	1	2	3	2	3	1	1	1	3	#NULL!	#NULL!	""	2	#NULL!	#NULL!	2	#NULL!	2	1	2	2	1	1	1	2	""	2	2	2	1	1	2	""	2	""	5	2	2	1	2	1	2	2	2	1
494654	2	28	2	1	1	2	1	2	3	2	2	2	1	1	4	""	2	#NULL!	#NULL!	2	#NULL!	2	1	4	2	1	4	1	10	""	#NULL!	2	2	1	1	2	""	2	""	5	2	2	2	2	1	2	2	2	1
494170	2	24	2	1	1	2	3	2	2	1	1	1	3	#NULL!	#NULL!	""	2	#NULL!	#NULL!	2	#NULL!	2	1	2	1	#NULL!	#NULL!	1	5	""	2	2	1	2	1	2	""	2	""	1	2	2	1	2	1	2	2	2	1
473500	2	25	2	1	1	2	3	2	1	4	2	2	1	1	3	""	2	#NULL!	#NULL!	2	#NULL!	2	1	2	2	1	4	1	10	""	#NULL!	2	1	1	1	2	""	2	""	5	2	2	1	2	1	2	2	2	1
494796	2	27	2	1	1	2	3	2	3	2	2	2	2	#NULL!	#NULL!	""	2	#NULL!	#NULL!	2	#NULL!	2	1	2	2	1	4	1	8	""	2	1	1	1	3	2	""	2	""	1	2	2	1	2	1	2	2	2	1
493806	2	21	2	1	1	2	2	2	2	1	1	1	3	#NULL!	#NULL!	""	2	#NULL!	#NULL!	2	#NULL!	2	1	2	1	#NULL!	#NULL!	1	5	""	2	2	1	1	1	1	"eclampsia"	2	""	1	2	2	1	2	1	2	2	2	1
488677	2	22	1	1	1	2	2	2	1	4	2	2	2	#NULL!	#NULL!	""	2	#NULL!	#NULL!	2	#NULL!	2	1	1	2	1	4	1	3	""	1	1	1	1	1	2	""	2	""	5	2	2	1	2	1	2	2	2	1
478858	2	22	2	1	1	2	1	2	3	2	1	1	3	#NULL!	#NULL!	""	2	#NULL!	#NULL!	2	#NULL!	2	1	4	2	1	3	1	8	""	2	1	1	2	3	2	""	2	""	1	2	2	1	2	1	2	2	2	1
461720	2	27	2	1	1	2	3	2	3	1	2	2	1	1	3	""	2	#NULL!	#NULL!	2	#NULL!	2	1	2	2	1	5	1	10	""	2	2	1	1	1	2	""	2	""	5	4	2	1	2	1	2	2	2	1
152253	2	33	2	1	1	2	3	2	2	2	2	2	2	#NULL!	#NULL!	""	2	#NULL!	#NULL!	2	#NULL!	2	1	2	1	#NULL!	#NULL!	1	8	""	2	2	1	1	2	1	"gestational HTN"	2	""	5	4	2	1	2	1	2	2	2	1
494185	2	26	2	1	1	2	2	2	3	1	1	1	3	#NULL!	#NULL!	""	2	#NULL!	#NULL!	2	#NULL!	2	1	1	2	1	4	1	2	""	2	2	2	2	1	2	""	2	""	5	2	2	1	2	1	2	2	2	1
493842	2	24	2	1	1	1	2	2	3	1	1	1	3	#NULL!	#NULL!	""	2	#NULL!	#NULL!	2	#NULL!	2	1	2	2	1	4	1	8	""	2	2	1	2	3	2	""	2	""	2	2	2	1	2	1	2	2	2	1
493646	2	28	2	1	1	2	2	2	2	2	1	1	3	#NULL!	#NULL!	""	2	#NULL!	#NULL!	2	#NULL!	2	1	2	2	1	4	1	8	""	2	1	1	1	3	2	""	2	""	5	2	2	1	2	1	2	2	2	2
479635	2	30	1	1	1	1	2	1	1	4	2	2	1	1	11	""	2	#NULL!	#NULL!	2	#NULL!	2	1	2	1	#NULL!	#NULL!	1	8	""	2	2	2	1	3	2	""	2	""	5	4	2	1	2	1	2	2	2	1
493853	2	25	1	1	1	2	2	2	1	4	1	1	3	#NULL!	#NULL!	""	2	#NULL!	#NULL!	2	#NULL!	2	2	#NULL!	1	#NULL!	#NULL!	1	2	""	2	2	2	2	1	2	""	2	""	5	2	2	1	2	1	2	2	2	1
493653	2	23	2	1	1	2	2	2	3	2	1	1	3	#NULL!	#NULL!	""	2	#NULL!	#NULL!	2	#NULL!	2	1	1	2	1	4	1	8	""	2	1	1	1	3	2	""	2	""	5	2	2	1	2	1	2	2	2	1
971084	2	29	2	1	2	2	1	2	1	4	2	2	1	2	8	""	2	#NULL!	#NULL!	2	#NULL!	2	1	2	1	#NULL!	#NULL!	1	12	"2 CD scar in labor"	2	2	1	1	1	2	""	2	""	5	2	2	1	2	1	2	2	2	1
492335	2	23	1	1	1	1	2	2	2	1	1	1	3	#NULL!	#NULL!	""	2	#NULL!	#NULL!	2	#NULL!	2	1	4	2	1	2	1	3	""	2	2	1	1	1	1	"APH"	2	""	5	2	2	1	2	1	2	2	2	2
903230	2	32	2	1	1	2	1	2	2	2	2	2	1	1	11	""	2	#NULL!	#NULL!	2	#NULL!	2	1	2	2	1	4	1	10	""	2	1	1	1	3	2	""	2	""	5	2	2	1	2	1	2	2	2	1
493699	2	39	2	1	1	2	2	2	3	1	3	3	2	#NULL!	#NULL!	""	2	#NULL!	#NULL!	2	#NULL!	2	1	2	2	1	4	1	3	""	2	2	2	1	1	2	""	2	""	5	2	2	1	2	1	2	2	2	1
493190	2	24	2	1	1	2	1	2	1	4	1	1	3	#NULL!	#NULL!	""	2	#NULL!	#NULL!	2	#NULL!	2	1	2	1	#NULL!	#NULL!	1	11	""	2	2	1	1	1	2	""	2	""	5	2	2	1	2	1	2	2	2	1
493258	2	39	1	1	1	2	1	2	1	4	3	3	2	#NULL!	#NULL!	""	2	#NULL!	#NULL!	2	#NULL!	2	1	1	1	#NULL!	#NULL!	1	5	""	2	2	1	1	1	1	"preeclampsia"	2	""	1	4	2	1	2	1	1	2	2	1
464029	2	38	2	1	1	2	1	2	2	2	2	2	2	#NULL!	#NULL!	""	2	#NULL!	#NULL!	2	#NULL!	2	1	2	2	1	4	1	11	""	2	1	1	1	1	2	""	2	""	5	2	2	1	2	1	2	2	2	1
493178	2	22	1	1	1	2	2	2	1	4	1	1	3	#NULL!	#NULL!	""	2	#NULL!	#NULL!	2	#NULL!	2	1	2	2	1	6	1	1	""	2	1	1	1	1	2	""	2	""	5	2	2	1	2	1	2	2	2	1
492672	2	28	2	1	1	2	2	2	1	4	1	1	3	#NULL!	#NULL!	""	2	#NULL!	#NULL!	2	#NULL!	2	1	4	2	1	5	1	2	""	2	2	2	1	1	2	""	2	""	2	2	2	1	2	1	2	2	2	1
489451	2	36	2	1	1	2	1	2	1	4	2	2	1	1	6	""	2	#NULL!	#NULL!	2	#NULL!	2	1	4	2	1	4	1	10	""	2	1	1	1	1	2	""	2	""	5	2	2	1	2	1	2	2	2	1
482746	2	28	2	1	1	2	2	2	3	1	2	2	1	1	11	""	2	#NULL!	#NULL!	2	#NULL!	2	1	2	2	1	4	1	8	""	2	2	1	1	3	2	""	2	""	5	2	2	1	2	1	2	2	2	1
492783	2	20	2	1	1	2	2	2	1	4	1	1	3	#NULL!	#NULL!	""	2	#NULL!	#NULL!	2	#NULL!	2	1	2	2	1	4	1	11	""	2	2	2	1	1	2	""	2	""	5	2	2	1	2	1	1	2	2	1
493041	2	24	1	1	1	2	2	2	2	1	1	1	3	#NULL!	#NULL!	""	2	#NULL!	#NULL!	2	#NULL!	2	1	2	1	#NULL!	#NULL!	1	3	""	2	2	1	1	1	2	""	2	""	5	2	2	1	2	1	2	2	2	2
492813	2	33	2	1	1	2	2	2	1	4	2	2	2	#NULL!	#NULL!	""	2	#NULL!	#NULL!	2	#NULL!	2	1	2	2	1	6	1	8	""	2	2	1	1	3	1	"postterm pregnancy"	2	""	5	2	2	1	2	1	2	2	2	1
483526	2	18	1	1	1	2	1	2	1	4	1	1	3	#NULL!	#NULL!	""	2	#NULL!	#NULL!	2	#NULL!	2	1	2	2	1	4	1	5	""	2	1	1	1	1	2	""	2	""	1	2	2	1	2	1	2	2	2	1
492436	2	25	2	1	1	2	1	2	1	4	1	1	3	#NULL!	#NULL!	""	2	#NULL!	#NULL!	2	#NULL!	2	1	1	2	1	4	1	8	""	2	2	1	1	2	2	""	2	""	5	4	2	1	2	1	2	2	2	1
492400	2	28	2	1	1	2	2	2	2	1	1	1	2	#NULL!	#NULL!	""	2	#NULL!	#NULL!	2	#NULL!	2	1	2	2	1	5	1	11	""	2	1	1	1	1	2	""	2	""	5	2	2	1	2	1	2	2	2	1
491411	2	31	2	1	1	2	2	2	1	4	1	1	3	#NULL!	#NULL!	""	2	#NULL!	#NULL!	2	#NULL!	2	1	4	2	1	3	1	8	""	2	2	1	1	2	1	"preeclampsia"	2	""	1	2	2	1	2	1	2	2	2	1
457933	2	27	2	1	1	2	3	2	3	1	1	1	3	#NULL!	#NULL!	""	2	#NULL!	#NULL!	2	#NULL!	2	1	2	2	1	3	2	3	""	2	2	1	1	1	1	"preeclampsia"	2	""	5	2	2	1	2	1	2	2	2	2
492480	2	37	2	1	1	2	1	2	1	4	2	2	2	#NULL!	#NULL!	""	2	#NULL!	#NULL!	2	#NULL!	2	1	1	2	1	4	1	3	""	2	2	1	1	1	2	""	2	""	5	2	2	1	2	1	2	2	2	1
492467	2	30	2	1	1	2	2	2	1	4	1	1	3	#NULL!	#NULL!	""	2	#NULL!	#NULL!	2	#NULL!	2	1	4	2	1	3	2	11	""	2	2	1	1	1	1	"multiple pregnancy"	2	""	5	2	2	1	2	1	2	2	2	2
240557	2	26	1	1	1	2	2	2	1	4	1	1	3	#NULL!	#NULL!	""	2	#NULL!	#NULL!	2	#NULL!	2	1	2	2	1	4	1	5	""	2	1	1	2	1	2	""	2	""	1	2	2	1	2	1	2	2	2	1
491922	2	24	2	1	1	2	2	2	1	4	1	1	3	#NULL!	#NULL!	""	2	#NULL!	#NULL!	2	#NULL!	2	1	2	1	#NULL!	#NULL!	1	2	""	2	2	2	1	1	2	""	2	""	5	2	2	1	2	1	2	2	2	1
252014	2	25	2	1	1	2	3	2	1	4	2	2	1	1	11	""	2	#NULL!	#NULL!	2	#NULL!	2	1	2	2	1	5	1	10	""	2	1	1	1	1	2	""	2	""	5	2	2	1	2	1	2	2	2	1
460482	2	30	2	1	1	2	3	2	2	2	2	2	1	1	3	""	2	#NULL!	#NULL!	2	#NULL!	2	1	2	2	1	4	1	10	""	2	2	1	1	3	2	""	2	""	5	2	2	1	2	1	2	2	2	1
491935	2	35	1	1	1	2	2	2	3	2	1	1	3	#NULL!	#NULL!	""	2	#NULL!	#NULL!	2	#NULL!	2	1	1	1	#NULL!	#NULL!	1	11	""	2	2	1	1	1	2	""	2	""	5	2	2	1	2	1	1	2	2	1
492104	2	28	2	1	1	2	2	2	1	4	2	2	2	#NULL!	#NULL!	""	2	#NULL!	#NULL!	2	#NULL!	2	1	4	2	1	4	1	1	""	2	2	1	1	1	2	""	2	""	5	2	2	1	2	1	2	2	2	1
472841	2	26	2	1	1	2	3	2	1	4	2	2	1	1	1	""	2	#NULL!	#NULL!	2	#NULL!	2	1	2	2	1	4	1	10	""	2	2	1	1	1	2	""	2	""	5	2	2	1	2	1	2	2	2	1
492251	2	32	1	1	1	2	2	2	1	4	2	2	2	#NULL!	#NULL!	""	2	#NULL!	#NULL!	2	#NULL!	2	1	2	1	#NULL!	#NULL!	2	11	""	2	1	1	1	1	1	"multiple pregnancy"	2	""	5	2	2	1	2	1	2	2	2	1
460124	2	27	2	1	1	2	3	2	3	2	1	1	3	#NULL!	#NULL!	""	2	#NULL!	#NULL!	2	#NULL!	2	1	2	2	1	5	1	1	""	2	1	1	1	1	2	""	2	""	5	2	2	1	2	1	2	2	2	1
973544	2	32	2	1	1	2	1	2	1	4	2	2	1	2	8	""	2	#NULL!	#NULL!	2	#NULL!	2	1	2	1	#NULL!	#NULL!	1	12	"2 CD scar in labor"	2	2	1	1	1	2	""	2	""	5	2	2	1	2	1	2	2	2	1
491622	2	28	2	1	1	2	2	2	1	4	1	1	3	#NULL!	#NULL!	""	2	#NULL!	#NULL!	2	#NULL!	2	1	2	2	1	4	1	2	""	2	2	2	1	1	2	""	2	""	5	2	2	1	2	1	2	2	2	1
811623	2	40	2	1	1	2	1	1	3	1	2	2	2	#NULL!	#NULL!	""	1	1	#NULL!	2	#NULL!	2	1	2	2	1	1	1	5	""	2	2	1	2	1	1	"preeclampsia"	2	""	1	2	2	1	2	1	2	2	2	1
481512	2	30	2	1	1	2	2	2	1	4	2	2	2	#NULL!	#NULL!	""	2	#NULL!	#NULL!	2	#NULL!	2	1	4	2	1	5	1	2	""	2	2	2	1	1	2	""	2	""	5	4	2	1	2	1	2	2	2	1
186631	2	35	2	1	1	2	2	2	1	4	2	2	2	#NULL!	#NULL!	""	2	#NULL!	#NULL!	2	#NULL!	2	1	4	2	1	3	1	5	""	2	1	1	1	1	1	"preeclampsia"	2	""	5	2	2	1	2	1	2	2	2	1
969880	2	30	2	1	1	2	3	2	2	2	2	2	1	1	1	""	2	#NULL!	#NULL!	2	#NULL!	2	1	2	2	1	4	1	10	""	2	2	1	1	1	2	""	2	""	5	2	2	1	2	1	2	2	2	1
491577	2	24	2	1	1	2	2	2	3	1	2	2	1	1	6	""	2	#NULL!	#NULL!	2	#NULL!	2	1	2	2	1	4	1	10	""	2	1	1	1	3	2	""	2	""	5	2	2	1	2	1	2	2	2	1
449966	2	29	2	1	1	2	3	2	1	4	2	2	1	1	11	""	2	#NULL!	#NULL!	2	#NULL!	2	1	2	2	1	4	1	10	""	2	1	1	1	1	2	""	2	""	5	2	2	1	2	1	2	2	2	1
481917	2	23	2	1	1	2	3	2	1	4	1	1	3	#NULL!	#NULL!	""	2	#NULL!	#NULL!	2	#NULL!	2	1	2	2	1	3	1	5	""	2	2	1	2	1	1	"PROM"	2	""	5	2	2	1	2	1	2	2	2	1
491001	2	24	2	1	1	2	2	2	2	1	2	2	1	1	11	""	2	#NULL!	#NULL!	2	#NULL!	2	1	2	2	1	5	1	10	""	2	1	1	1	1	2	""	2	""	5	2	2	1	2	1	2	2	2	1
488076	2	23	1	1	1	2	3	1	1	4	2	2	1	2	8	""	2	#NULL!	#NULL!	2	#NULL!	2	1	2	2	1	4	1	10	""	2	2	1	1	1	2	""	2	""	5	2	2	1	2	1	2	2	2	1
491096	2	37	1	1	1	2	2	2	1	4	2	2	1	1	7	""	2	#NULL!	#NULL!	2	#NULL!	2	1	2	2	1	4	1	10	""	2	2	1	1	1	1	"preeclampsia"	1	"goiter"	5	2	2	1	2	1	2	2	2	1
488733	2	36	2	1	1	2	3	2	3	3	2	2	1	1	11	""	2	#NULL!	#NULL!	2	#NULL!	2	1	4	2	1	4	1	10	""	2	2	1	1	1	2	""	2	""	5	2	2	1	2	1	2	2	2	1
490856	2	25	1	1	1	1	2	2	2	1	1	1	3	#NULL!	#NULL!	""	2	#NULL!	#NULL!	2	#NULL!	2	1	2	2	1	4	1	11	""	2	2	1	1	1	1	"preeclampsia"	2	""	5	2	2	1	2	1	2	2	2	1
736953	2	32	2	1	1	2	1	2	1	4	2	2	2	#NULL!	#NULL!	""	2	#NULL!	#NULL!	2	#NULL!	2	1	2	2	1	6	1	8	""	2	2	1	1	3	2	""	2	""	2	2	2	1	2	1	2	2	2	1
490875	2	28	2	1	1	1	2	2	2	1	1	1	3	#NULL!	#NULL!	""	2	#NULL!	#NULL!	2	#NULL!	2	1	2	2	1	5	1	8	""	2	2	2	1	2	2	""	2	""	5	4	2	1	2	1	2	2	2	1
789908	2	26	2	1	1	2	1	2	1	4	2	2	2	#NULL!	#NULL!	""	2	#NULL!	#NULL!	2	#NULL!	2	1	2	1	#NULL!	#NULL!	1	5	""	2	1	1	1	1	1	"APH"	2	""	1	2	2	1	2	1	2	2	2	1
742730	2	22	2	1	1	2	1	2	1	4	2	2	1	1	6	""	2	#NULL!	#NULL!	2	#NULL!	2	1	2	1	#NULL!	#NULL!	1	10	""	2	2	1	1	1	2	""	2	""	5	2	2	1	2	1	2	2	2	1
994967	2	24	2	1	1	2	1	2	1	4	1	1	3	#NULL!	#NULL!	""	2	#NULL!	#NULL!	2	#NULL!	2	1	4	2	1	4	1	11	""	2	2	1	1	1	2	""	2	""	5	2	2	1	2	1	2	2	2	1
484482	2	28	2	1	1	2	2	2	1	4	2	2	1	1	11	""	2	#NULL!	#NULL!	2	#NULL!	2	1	1	2	1	3	1	10	""	2	2	1	1	1	2	""	2	""	5	2	2	1	2	1	2	2	2	1
484440	2	28	1	1	1	2	2	2	1	4	1	1	3	#NULL!	#NULL!	""	2	#NULL!	#NULL!	2	#NULL!	2	1	1	1	#NULL!	#NULL!	1	2	""	2	2	2	1	1	2	""	2	""	5	2	2	1	2	1	2	2	2	1
484390	2	32	2	1	1	2	1	2	1	4	2	2	2	#NULL!	#NULL!	""	1	1	#NULL!	2	#NULL!	2	1	2	2	1	5	1	3	""	2	2	1	1	1	2	""	2	""	5	2	2	1	2	1	2	2	2	2
484208	2	18	2	1	1	2	2	2	3	2	1	1	3	#NULL!	#NULL!	""	2	#NULL!	#NULL!	2	#NULL!	2	1	4	2	1	5	1	1	""	2	1	1	1	1	2	""	2	""	5	2	2	1	2	1	2	2	2	1
484137	2	28	2	1	1	2	2	2	3	1	1	1	3	#NULL!	#NULL!	""	2	#NULL!	#NULL!	2	#NULL!	2	1	2	2	1	3	1	8	""	2	1	1	1	3	2	""	2	""	1	2	2	1	2	1	2	2	2	1
468577	2	18	2	1	1	2	1	2	1	4	1	1	3	#NULL!	#NULL!	""	2	#NULL!	#NULL!	2	#NULL!	2	1	1	1	#NULL!	#NULL!	1	5	""	2	1	1	2	1	1	"chorioaminitis"	2	""	1	2	2	1	1	1	2	1	1	1
448215	2	24	2	1	1	2	3	2	1	4	1	1	3	#NULL!	#NULL!	""	2	#NULL!	#NULL!	2	#NULL!	2	1	2	2	1	4	1	5	""	2	1	1	2	1	2	""	2	""	1	2	2	1	2	1	2	2	2	1
483689	2	24	2	1	1	2	2	2	1	4	1	1	3	#NULL!	#NULL!	""	2	#NULL!	#NULL!	2	#NULL!	2	1	1	2	1	5	1	2	""	2	2	2	1	1	1	"preeclampsia"	2	""	5	2	2	1	2	1	2	2	2	1
919965	2	21	2	1	1	2	3	2	1	4	2	2	1	1	6	""	2	#NULL!	#NULL!	2	#NULL!	2	1	2	2	1	3	1	10	""	2	1	1	1	1	2	""	2	""	5	2	2	1	2	1	2	2	2	1
483728	2	28	2	1	1	2	2	2	2	1	2	2	2	#NULL!	#NULL!	""	2	#NULL!	#NULL!	2	#NULL!	2	1	2	2	1	4	1	2	""	2	2	2	1	1	2	""	2	""	5	2	2	1	2	1	2	2	2	1
794278	2	35	2	1	1	2	3	2	1	4	2	2	2	#NULL!	#NULL!	""	2	#NULL!	#NULL!	2	#NULL!	2	1	2	2	1	4	1	1	""	2	2	1	2	1	2	""	2	""	5	2	2	1	2	1	2	2	2	1
483683	2	27	1	1	1	2	2	2	1	4	2	2	1	2	11	""	2	#NULL!	#NULL!	2	#NULL!	2	1	1	2	1	5	1	12	"2 CD scar in labor"	2	1	1	2	1	2	""	2	""	5	2	2	1	2	1	2	2	2	1
482667	2	30	2	1	1	2	1	2	2	1	2	2	1	1	6	""	2	#NULL!	#NULL!	2	#NULL!	2	1	2	2	1	3	1	8	""	2	1	1	1	3	2	""	2	""	5	2	2	1	2	1	2	2	2	1
482748	2	26	2	1	1	2	2	2	3	1	1	1	3	#NULL!	#NULL!	""	2	#NULL!	#NULL!	2	#NULL!	2	1	4	2	1	4	1	5	""	2	1	1	1	3	2	""	2	""	1	2	2	1	2	1	2	2	2	1
390823	2	32	2	1	1	2	1	2	3	1	2	2	2	#NULL!	#NULL!	""	2	#NULL!	#NULL!	2	#NULL!	2	1	4	2	1	3	1	8	""	2	1	1	1	1	2	""	2	""	5	2	2	1	2	1	2	2	2	1
482338	2	28	2	1	1	2	2	2	3	1	2	2	1	1	3	""	1	1	#NULL!	2	#NULL!	2	1	2	1	#NULL!	#NULL!	1	10	""	2	1	1	1	1	2	""	2	""	5	2	2	1	2	1	2	2	2	1
298072	2	27	2	1	1	2	2	2	1	4	2	2	1	1	3	""	2	#NULL!	#NULL!	2	#NULL!	2	1	2	2	1	4	1	10	""	2	2	1	1	1	2	""	2	""	5	2	2	1	2	1	2	2	2	1
477458	2	26	1	1	1	2	3	2	1	4	1	1	3	#NULL!	#NULL!	""	2	#NULL!	#NULL!	2	#NULL!	2	1	2	2	1	3	2	3	""	2	1	1	1	1	1	"multiple pregnancy"	2	""	5	2	2	1	2	1	2	2	2	2
483514	2	30	1	1	1	2	2	2	1	4	2	2	1	1	11	""	2	#NULL!	#NULL!	2	#NULL!	2	1	2	1	#NULL!	#NULL!	1	3	""	2	1	1	1	1	2	""	2	""	5	2	2	1	2	1	2	2	2	2
483373	2	23	2	1	1	2	2	2	1	4	2	2	1	1	11	""	2	#NULL!	#NULL!	2	#NULL!	2	1	2	2	1	3	1	8	""	2	2	1	1	3	2	""	2	""	5	2	2	1	2	1	2	2	2	1
483179	2	30	2	1	1	2	1	2	1	4	2	2	1	1	11	""	2	#NULL!	#NULL!	2	#NULL!	2	1	4	2	1	4	1	10	""	2	2	1	2	1	2	""	2	""	5	2	2	1	2	1	2	2	2	1
483178	2	28	2	1	1	2	2	2	1	4	2	2	1	2	11	""	2	#NULL!	#NULL!	2	#NULL!	2	1	4	2	1	4	1	12	"2 CD scar in labor"	2	1	1	1	1	2	""	2	""	5	2	2	1	2	1	2	2	2	1
482940	2	21	2	1	1	2	2	2	1	4	1	1	3	#NULL!	#NULL!	""	2	#NULL!	#NULL!	2	#NULL!	2	1	1	2	1	4	1	8	""	2	1	2	2	3	2	""	2	""	5	2	2	1	2	1	2	2	2	1
482360	2	24	2	1	1	2	1	2	3	1	1	1	3	#NULL!	#NULL!	""	2	#NULL!	#NULL!	2	#NULL!	2	1	1	2	1	4	1	2	""	2	2	2	2	1	2	""	2	""	2	2	2	1	2	1	2	2	2	1
474782	2	19	2	1	1	2	2	2	1	4	2	2	2	#NULL!	#NULL!	""	2	#NULL!	#NULL!	2	#NULL!	2	1	1	2	1	3	2	3	""	2	1	1	2	1	1	"PROM"	2	""	5	2	2	1	2	1	2	2	2	2
483594	2	28	2	1	1	2	2	2	1	4	3	3	1	2	11	""	2	#NULL!	#NULL!	2	#NULL!	2	1	1	2	1	3	1	12	"2 CD scar in labor"	2	2	1	1	4	1	"IUFD"	2	""	5	2	2	1	2	1	2	2	2	2
482360	2	30	2	1	1	2	1	1	1	4	2	2	2	#NULL!	#NULL!	""	2	#NULL!	#NULL!	2	#NULL!	2	1	1	2	1	4	1	8	""	2	2	1	1	2	2	""	2	""	5	4	2	1	2	1	2	2	2	1
482342	2	26	1	1	1	1	2	2	1	4	2	2	2	#NULL!	#NULL!	""	2	#NULL!	#NULL!	2	#NULL!	2	1	2	2	1	2	1	3	""	2	2	1	1	1	2	""	2	""	5	2	2	1	2	1	2	2	2	2
482324	2	27	2	1	1	3	1	2	1	4	2	2	2	#NULL!	#NULL!	""	2	#NULL!	#NULL!	2	#NULL!	2	1	1	2	1	4	1	11	""	2	2	1	1	1	2	""	2	""	5	2	2	1	2	1	2	2	2	1
474370	2	28	1	1	1	2	2	2	1	4	2	2	2	#NULL!	#NULL!	""	2	#NULL!	#NULL!	2	#NULL!	2	1	2	2	1	3	2	3	""	2	1	1	1	1	1	"multiple pregnancy"	2	""	5	2	2	1	2	1	2	2	2	2
449975	2	27	2	1	1	2	3	2	2	1	2	2	1	1	11	""	1	1	#NULL!	2	#NULL!	2	1	2	2	1	3	1	10	""	2	1	1	1	1	2	""	2	""	5	2	2	1	2	1	2	2	2	1
844183	2	28	2	1	1	2	1	2	1	4	2	2	1	2	11	""	2	#NULL!	#NULL!	2	#NULL!	2	1	2	2	1	3	1	12	"2 CD scar in labor"	2	2	2	1	1	2	""	2	""	5	2	2	1	2	1	2	2	2	1
481323	2	22	2	1	1	2	1	2	1	4	1	1	3	#NULL!	#NULL!	""	2	#NULL!	#NULL!	2	#NULL!	2	1	1	2	1	2	1	2	""	2	2	2	1	1	2	""	2	""	2	2	2	1	2	1	2	2	2	1
459489	2	24	2	1	1	2	3	2	1	4	1	1	3	#NULL!	#NULL!	""	2	#NULL!	#NULL!	2	#NULL!	2	1	2	2	1	3	2	11	""	2	1	1	1	1	1	"multiple pregnancy"	2	""	5	2	2	1	2	1	2	2	2	1
482246	2	30	2	1	1	2	2	2	1	4	2	2	2	#NULL!	#NULL!	""	2	#NULL!	#NULL!	2	#NULL!	2	1	2	2	1	6	1	3	""	2	2	1	1	1	2	""	2	""	5	2	2	1	2	1	2	2	2	2
388741	2	27	2	1	1	2	2	2	3	1	2	2	1	2	11	""	2	#NULL!	#NULL!	2	#NULL!	2	1	4	2	1	4	1	12	"2 CD scar in labor"	2	2	1	1	1	2	""	2	""	5	2	2	1	2	1	2	2	2	1
482176	2	29	2	1	1	2	3	2	2	1	1	1	3	#NULL!	#NULL!	""	2	#NULL!	#NULL!	2	#NULL!	2	1	4	2	1	4	1	11	""	2	1	1	1	1	2	""	2	""	5	2	2	1	2	1	2	2	2	1
474342	2	26	2	1	1	2	2	2	1	4	2	2	1	1	11	""	2	#NULL!	#NULL!	2	#NULL!	2	1	2	2	1	4	1	10	""	2	1	1	1	1	2	""	2	""	5	2	2	1	2	1	2	2	2	1
368249	2	40	2	1	1	1	1	1	3	1	3	3	2	#NULL!	#NULL!	""	2	#NULL!	#NULL!	2	#NULL!	2	1	2	2	1	4	1	3	""	2	1	1	1	1	2	""	2	""	5	2	2	1	2	1	2	2	2	2
478190	2	29	2	1	1	2	2	2	1	4	2	2	1	1	6	""	2	#NULL!	#NULL!	2	#NULL!	2	1	2	2	1	4	1	10	""	2	1	1	1	1	2	""	2	""	5	2	2	1	2	1	2	2	2	1
400481	2	36	2	1	1	2	1	2	3	2	2	2	1	1	6	""	2	#NULL!	#NULL!	2	#NULL!	2	1	2	2	1	4	1	10	""	2	2	1	1	1	2	""	2	""	5	2	2	1	2	1	2	2	2	1
975341	2	35	2	1	1	2	2	2	1	4	3	3	1	1	3	""	2	#NULL!	#NULL!	2	#NULL!	2	1	1	1	#NULL!	#NULL!	1	8	""	2	2	1	1	2	2	""	2	""	5	4	2	1	2	1	2	2	2	1
481335	2	23	1	1	1	2	2	2	1	4	1	1	3	#NULL!	#NULL!	""	2	#NULL!	#NULL!	2	#NULL!	2	1	1	2	1	4	1	2	""	2	2	2	2	1	2	""	2	""	5	2	2	1	2	1	2	2	2	1
481577	2	20	2	1	1	2	2	2	1	4	1	1	3	#NULL!	#NULL!	""	2	#NULL!	#NULL!	2	#NULL!	2	1	4	2	1	4	1	8	""	2	1	1	1	3	2	""	2	""	5	2	2	1	2	1	2	2	2	1
255049	2	30	2	1	1	2	3	2	1	4	2	2	2	#NULL!	#NULL!	""	2	#NULL!	#NULL!	2	#NULL!	2	1	2	2	1	6	1	8	""	2	1	2	2	2	2	""	2	""	1	4	2	1	2	1	2	2	2	1
481806	2	35	1	1	1	2	2	1	1	4	3	3	2	#NULL!	#NULL!	""	2	#NULL!	#NULL!	2	#NULL!	2	1	2	1	#NULL!	#NULL!	1	4	""	2	2	1	1	2	2	""	2	""	5	4	2	1	2	1	2	2	2	1
480883	2	25	2	1	1	1	2	2	2	1	1	1	3	#NULL!	#NULL!	""	2	#NULL!	#NULL!	2	#NULL!	2	1	2	1	#NULL!	#NULL!	1	2	""	2	2	2	1	1	2	""	2	""	5	2	2	1	2	1	2	2	2	1
477009	2	24	2	1	1	2	1	2	1	4	1	1	3	#NULL!	#NULL!	""	2	#NULL!	#NULL!	2	#NULL!	2	1	2	2	2	3	2	5	""	2	1	1	2	1	1	"PROM"	2	""	1	2	2	1	2	1	2	2	2	1
477478	2	29	1	1	1	2	2	2	1	4	1	1	3	#NULL!	#NULL!	""	2	#NULL!	#NULL!	2	#NULL!	2	1	4	2	1	2	1	8	""	2	1	1	1	2	1	"preeclampsia"	2	""	1	4	2	1	2	1	2	2	2	1
480965	2	27	2	1	1	2	2	2	1	4	2	2	2	#NULL!	#NULL!	""	2	#NULL!	#NULL!	2	#NULL!	2	1	2	1	#NULL!	#NULL!	1	2	""	2	1	2	1	1	2	""	2	""	5	2	2	1	2	1	2	2	2	1
480987	2	30	1	1	1	2	2	1	1	4	3	3	1	1	11	""	2	#NULL!	#NULL!	2	#NULL!	2	1	2	1	#NULL!	#NULL!	1	10	""	2	1	2	2	1	2	""	2	""	5	2	2	1	2	1	2	2	2	1
481289	2	24	2	1	1	2	1	2	2	1	1	1	3	#NULL!	#NULL!	""	2	#NULL!	#NULL!	2	#NULL!	2	1	4	2	1	4	1	8	""	2	1	1	1	3	2	""	2	""	5	1	2	1	2	1	2	2	2	1
481221	2	28	1	1	1	2	2	2	1	4	2	2	2	#NULL!	#NULL!	""	2	#NULL!	#NULL!	2	#NULL!	2	1	2	2	1	2	2	3	""	2	1	1	1	1	1	"multiple pregnancy"	2	""	5	2	2	1	2	1	2	2	2	2
153417	2	27	2	1	1	2	3	2	3	1	2	2	1	1	11	""	2	#NULL!	#NULL!	2	#NULL!	2	1	2	2	1	4	1	8	""	2	1	1	2	3	2	""	2	""	5	2	2	1	2	1	2	2	2	1
481007	2	27	2	1	1	2	2	2	1	4	1	1	3	#NULL!	#NULL!	""	2	#NULL!	#NULL!	2	#NULL!	2	1	2	2	1	5	1	3	""	2	1	1	2	1	2	""	2	""	5	2	2	1	2	1	2	2	2	1
480381	2	24	2	1	1	2	2	2	1	4	1	1	3	#NULL!	#NULL!	""	2	#NULL!	#NULL!	2	#NULL!	2	1	1	1	#NULL!	#NULL!	1	8	""	2	1	1	2	3	2	""	2	""	2	2	2	1	2	1	2	2	2	1
383390	2	26	2	1	1	2	3	2	3	1	2	2	1	1	3	""	2	#NULL!	#NULL!	2	#NULL!	2	1	2	2	1	4	1	10	""	2	1	1	1	1	2	""	2	""	5	2	2	1	2	1	2	2	2	1
480730	2	29	2	1	1	2	2	2	2	1	2	2	2	#NULL!	#NULL!	""	2	#NULL!	#NULL!	2	#NULL!	2	1	2	2	1	4	1	2	""	2	2	2	1	1	2	""	2	""	5	2	2	1	2	1	2	2	2	1
480161	2	24	2	1	1	2	2	2	2	1	2	2	2	#NULL!	#NULL!	""	2	#NULL!	#NULL!	2	#NULL!	2	1	2	1	#NULL!	#NULL!	1	4	""	2	2	1	1	1	2	""	2	""	5	4	2	1	2	1	2	2	2	1
479482	2	20	2	1	1	2	2	2	3	1	2	2	2	#NULL!	#NULL!	""	2	#NULL!	#NULL!	2	#NULL!	2	1	1	1	#NULL!	#NULL!	1	8	""	2	1	1	1	3	2	""	2	""	5	2	2	1	2	1	2	2	2	1
473882	2	34	2	1	1	2	1	2	3	2	2	2	1	2	8	""	2	#NULL!	#NULL!	2	#NULL!	2	1	2	1	#NULL!	#NULL!	1	12	"2 CD scar in labor"	2	2	1	1	1	2	""	2	""	5	2	2	1	2	1	2	2	2	1
486850	2	40	2	1	1	2	2	1	1	4	3	3	2	#NULL!	#NULL!	""	2	#NULL!	#NULL!	2	#NULL!	2	1	2	2	1	4	1	8	""	2	1	1	2	3	2	""	1	"Asthma"	5	2	2	1	2	1	2	2	2	1
487298	2	26	2	1	1	2	2	2	3	2	1	1	3	#NULL!	#NULL!	""	2	#NULL!	#NULL!	2	#NULL!	2	1	2	2	1	5	1	3	""	2	2	1	2	1	1	"preeclampsia"	2	""	5	4	2	1	2	1	2	2	2	2
463767	2	32	2	1	1	2	1	2	3	2	2	2	1	1	4	""	2	#NULL!	#NULL!	2	#NULL!	2	1	2	2	1	4	2	10	""	2	1	1	1	1	2	""	2	""	5	2	2	1	2	1	2	2	2	1
487277	2	35	2	1	2	2	2	2	1	4	2	2	2	#NULL!	#NULL!	""	2	#NULL!	#NULL!	2	#NULL!	2	1	4	2	1	3	1	3	""	2	2	1	1	1	2	""	1	"DM"	5	2	2	1	2	1	2	2	2	2
487278	2	25	2	1	1	1	2	2	3	1	1	1	3	#NULL!	#NULL!	""	2	#NULL!	#NULL!	2	#NULL!	2	1	1	2	1	4	1	8	""	2	1	1	1	2	2	""	2	""	5	2	2	1	2	1	1	2	2	1
486962	2	45	2	1	1	2	2	2	1	4	2	2	1	1	11	""	2	#NULL!	#NULL!	2	#NULL!	2	1	4	2	1	6	1	10	""	2	1	1	1	1	1	"postterm pregnancy"	2	""	5	2	2	1	2	1	2	2	2	1
486422	2	32	2	1	1	2	1	2	2	2	2	2	1	1	11	""	2	#NULL!	#NULL!	2	#NULL!	2	1	2	2	1	4	1	10	""	2	1	1	1	1	2	""	2	""	5	2	2	1	2	1	2	2	2	1
965969	2	23	2	1	1	2	2	2	1	4	2	2	2	#NULL!	#NULL!	""	2	#NULL!	#NULL!	2	#NULL!	2	1	4	2	1	4	1	3	""	2	2	1	1	1	2	""	2	""	5	2	2	1	2	1	2	2	2	1
268475	2	33	2	1	1	2	1	2	1	4	2	2	1	1	3	""	2	#NULL!	#NULL!	2	#NULL!	2	1	4	2	1	3	1	10	""	2	2	1	1	1	2	""	2	""	5	2	2	1	2	1	2	2	2	1
485022	2	25	2	1	1	2	1	2	1	4	2	2	2	#NULL!	#NULL!	""	2	#NULL!	#NULL!	2	#NULL!	2	1	1	1	#NULL!	#NULL!	1	3	""	2	1	1	1	1	2	""	2	""	5	2	2	1	2	1	2	2	2	2
453839	2	24	2	1	1	2	2	2	2	2	1	1	3	#NULL!	#NULL!	""	2	#NULL!	#NULL!	2	#NULL!	2	1	1	2	1	5	1	8	""	2	2	2	1	3	1	"APH"	2	""	5	2	2	1	2	1	2	2	2	1
942198	2	33	1	1	1	2	2	2	1	4	3	3	2	#NULL!	#NULL!	""	2	#NULL!	#NULL!	2	#NULL!	2	1	1	2	1	4	1	2	""	2	2	2	1	1	2	""	2	""	5	2	2	1	2	1	2	2	2	1
477687	2	27	1	1	1	2	2	2	1	4	2	2	2	#NULL!	#NULL!	""	2	#NULL!	#NULL!	2	#NULL!	2	1	2	2	1	4	1	3	""	2	1	1	1	1	2	""	2	""	5	2	2	1	2	1	2	2	2	1
485884	2	38	1	1	1	2	2	2	1	4	3	3	2	#NULL!	#NULL!	""	2	#NULL!	#NULL!	2	#NULL!	2	1	1	2	1	4	1	8	""	2	2	2	1	3	2	""	2	""	5	2	2	1	2	1	2	2	2	1
479391	2	31	2	1	1	2	3	2	2	2	2	2	2	#NULL!	#NULL!	""	2	#NULL!	#NULL!	2	#NULL!	2	1	4	2	1	4	1	8	""	2	2	1	1	3	2	""	2	""	5	2	2	1	2	1	2	2	2	1
392085	2	22	2	1	1	2	1	2	2	1	1	1	3	#NULL!	#NULL!	""	2	#NULL!	#NULL!	2	#NULL!	2	1	2	2	1	3	1	5	""	2	2	1	1	1	2	""	2	""	1	2	2	1	2	1	2	2	2	1
485736	2	25	2	1	1	2	1	2	1	4	1	1	3	#NULL!	#NULL!	""	2	#NULL!	#NULL!	2	#NULL!	2	1	2	2	1	4	1	2	""	2	2	2	1	1	2	""	2	""	5	2	2	1	2	1	2	2	2	1
485642	2	26	2	1	1	2	1	2	1	4	1	1	3	#NULL!	#NULL!	""	2	#NULL!	#NULL!	2	#NULL!	2	1	1	1	#NULL!	#NULL!	1	8	""	2	2	2	1	3	2	""	2	""	5	2	2	1	2	1	2	2	2	3
970481	2	31	2	1	1	2	1	2	3	1	1	1	3	#NULL!	#NULL!	""	2	#NULL!	#NULL!	2	#NULL!	2	1	1	1	#NULL!	#NULL!	1	8	""	2	1	2	1	3	2	""	2	""	5	2	2	1	2	1	2	2	2	1
485026	2	29	2	1	1	2	1	2	1	4	1	1	3	#NULL!	#NULL!	""	2	#NULL!	#NULL!	2	#NULL!	2	1	2	2	1	4	1	1	""	2	2	1	1	1	2	""	2	""	5	2	2	1	2	1	2	2	2	1
146548	2	28	2	1	1	2	2	2	1	4	2	2	2	#NULL!	#NULL!	""	2	#NULL!	#NULL!	2	#NULL!	2	1	2	2	1	2	2	9	""	2	1	1	1	4	1	"APH"	2	""	5	4	2	1	2	1	2	2	2	1
485840	2	28	2	1	1	2	2	2	1	4	1	1	3	#NULL!	#NULL!	""	2	#NULL!	#NULL!	2	#NULL!	2	1	1	2	1	3	1	8	""	2	2	1	1	3	2	""	2	""	5	4	2	1	2	1	2	2	2	1
485832	2	19	2	1	1	2	2	2	2	1	1	1	3	#NULL!	#NULL!	""	2	#NULL!	#NULL!	2	#NULL!	2	1	2	1	#NULL!	#NULL!	1	2	""	2	2	2	1	3	2	""	2	""	5	2	2	1	2	1	2	2	2	1
485766	2	40	2	1	1	2	1	2	1	4	3	3	2	#NULL!	#NULL!	""	1	1	#NULL!	2	#NULL!	2	1	4	1	#NULL!	#NULL!	1	9	""	2	1	1	1	1	2	""	2	""	5	2	2	1	2	1	2	2	2	1
192726	2	28	2	1	1	2	1	2	1	4	2	2	1	1	3	""	2	#NULL!	#NULL!	2	#NULL!	2	1	2	2	1	6	1	10	""	2	2	1	1	1	1	"postterm pregnancy"	2	""	5	4	2	1	2	1	2	2	2	1
480477	2	30	1	1	1	2	1	2	2	1	1	1	3	#NULL!	#NULL!	""	1	1	#NULL!	2	#NULL!	2	2	#NULL!	2	1	6	1	8	""	2	1	1	1	3	1	"postterm pregnancy"	2	""	2	2	2	1	2	1	2	2	2	1
771751	2	26	2	1	1	2	1	2	1	4	2	2	1	1	6	""	1	1	#NULL!	2	#NULL!	2	1	2	2	1	4	1	10	""	2	2	1	1	1	2	""	2	""	5	2	2	1	2	1	2	2	2	1
484731	2	28	2	1	1	2	2	2	2	2	2	2	1	1	11	""	2	#NULL!	#NULL!	2	#NULL!	2	1	4	2	1	5	1	1	""	2	1	1	1	1	2	""	2	""	5	2	2	1	2	1	2	2	2	1
484354	2	24	2	1	2	2	3	2	1	4	1	1	3	#NULL!	#NULL!	""	2	#NULL!	#NULL!	2	#NULL!	2	1	2	2	2	1	1	8	""	2	1	1	1	1	2	""	2	""	5	2	2	1	2	1	2	2	2	1
484668	2	25	2	1	1	2	2	2	1	4	2	2	2	#NULL!	#NULL!	""	2	#NULL!	#NULL!	2	#NULL!	2	1	1	2	1	6	1	8	""	2	2	1	1	2	1	"APH"	2	""	5	4	2	1	2	1	2	2	2	1
448015	2	24	2	1	1	2	3	2	1	4	2	2	1	1	3	""	1	1	#NULL!	2	#NULL!	2	1	2	2	1	4	1	10	""	2	1	1	1	1	2	""	2	""	5	2	2	1	2	1	2	2	2	1
484748	2	24	2	1	1	2	2	2	1	4	1	1	3	#NULL!	#NULL!	""	1	1	#NULL!	2	#NULL!	2	1	2	2	1	3	1	2	""	2	2	2	1	3	2	""	2	""	5	2	2	1	2	1	1	2	2	1
703168	2	27	2	1	1	2	1	2	1	4	2	2	1	1	11	""	2	#NULL!	#NULL!	2	#NULL!	2	1	4	2	1	4	1	10	""	2	1	1	1	1	2	""	2	""	5	2	2	1	2	1	2	2	2	1
484656	2	30	2	1	1	2	2	2	1	4	2	2	2	#NULL!	#NULL!	""	2	#NULL!	#NULL!	2	#NULL!	2	1	1	1	#NULL!	#NULL!	1	2	""	2	2	2	1	4	1	"obstructed labor"	2	""	5	4	2	1	1	1	1	2	2	3
484749	2	29	2	1	1	2	2	2	1	4	2	2	2	#NULL!	#NULL!	""	2	#NULL!	#NULL!	2	#NULL!	2	1	2	2	1	4	1	10	""	2	2	2	1	1	2	""	2	""	5	2	2	1	2	1	2	2	2	1
484487	2	29	2	1	1	2	2	2	2	1	1	1	3	#NULL!	#NULL!	""	1	1	#NULL!	2	#NULL!	2	1	4	2	1	1	1	3	""	2	2	2	1	1	1	"preterm labor"	2	""	5	2	2	1	2	1	2	2	2	2
474589	2	19	2	1	1	2	3	2	1	4	1	1	3	#NULL!	#NULL!	""	2	#NULL!	#NULL!	2	#NULL!	2	1	2	2	1	1	2	3	""	2	1	1	1	1	1	"preterm labor"	2	""	5	2	2	1	2	1	2	2	2	2
484513	2	28	1	1	1	2	2	2	1	4	2	2	1	1	6	""	2	#NULL!	#NULL!	2	#NULL!	2	1	2	2	1	4	1	10	""	2	2	1	1	1	1	"APH"	2	""	5	2	2	1	2	1	2	2	2	1
488467	2	36	2	1	1	2	2	2	1	4	3	3	2	#NULL!	#NULL!	""	2	#NULL!	#NULL!	2	#NULL!	2	1	1	1	#NULL!	#NULL!	1	1	""	2	2	1	1	1	2	""	2	""	5	2	2	1	2	1	2	2	2	1
457717	2	29	2	1	1	2	2	2	2	2	1	1	3	#NULL!	#NULL!	""	2	#NULL!	#NULL!	2	#NULL!	2	1	2	2	1	4	1	11	""	2	1	1	1	1	1	"preeclampsia"	2	""	5	2	2	1	2	1	1	1	1	1
822580	2	32	1	1	1	2	1	2	1	4	2	2	1	1	3	""	2	#NULL!	#NULL!	2	#NULL!	2	1	2	2	1	2	1	10	""	2	2	2	1	1	1	"preterm labor"	2	""	5	2	2	1	2	1	2	2	2	1
911909	2	27	2	1	1	2	2	2	1	4	1	1	3	#NULL!	#NULL!	""	1	1	#NULL!	2	#NULL!	2	1	2	2	1	3	1	11	""	2	1	1	1	1	1	"preeclampsia"	2	""	1	2	2	1	2	1	2	2	2	1
482420	2	18	1	1	1	1	2	2	2	1	1	1	3	#NULL!	#NULL!	""	2	#NULL!	#NULL!	2	#NULL!	2	1	2	2	1	4	1	2	""	2	2	2	1	1	2	""	2	""	5	2	2	1	2	1	2	2	2	1
392911	2	25	2	1	1	2	1	2	2	1	1	1	3	#NULL!	#NULL!	""	2	#NULL!	#NULL!	2	#NULL!	2	1	2	2	1	6	1	8	""	2	2	1	1	2	2	""	2	""	5	4	2	1	2	1	2	2	2	1
473863	2	32	2	1	1	1	1	1	1	4	3	3	2	#NULL!	#NULL!	""	2	#NULL!	#NULL!	2	#NULL!	2	1	2	1	#NULL!	#NULL!	1	3	""	2	1	1	1	1	2	""	2	""	5	2	2	1	2	1	2	2	2	2
488470	2	35	2	1	1	2	2	2	1	4	3	3	2	#NULL!	#NULL!	""	2	#NULL!	#NULL!	2	#NULL!	2	1	1	2	1	5	1	2	""	2	2	2	2	1	1	"preeclampsia"	2	""	5	2	2	1	2	1	2	2	2	1
488421	2	25	2	1	1	2	2	2	3	1	1	1	3	#NULL!	#NULL!	""	2	#NULL!	#NULL!	2	#NULL!	2	1	1	1	#NULL!	#NULL!	1	1	""	2	2	1	2	1	1	"PROM"	2	""	1	2	2	1	2	1	2	2	2	1
461702	2	33	2	1	1	2	1	2	2	1	2	2	1	1	3	""	2	#NULL!	#NULL!	2	#NULL!	2	1	2	1	#NULL!	#NULL!	1	10	""	2	1	1	1	1	2	""	2	""	5	2	2	1	2	1	2	2	2	1
487944	2	27	2	1	1	2	1	2	1	4	1	1	3	#NULL!	#NULL!	""	2	#NULL!	#NULL!	2	#NULL!	2	1	2	2	1	4	1	8	""	2	2	2	2	2	2	""	2	""	5	2	2	1	2	1	2	2	2	3
272184	2	32	2	1	1	2	1	2	3	1	3	3	1	2	8	""	2	#NULL!	#NULL!	2	#NULL!	2	1	2	1	#NULL!	#NULL!	1	12	"2 CD scar in labor"	2	2	1	1	1	2	""	2	""	5	2	2	1	2	1	2	2	2	1
461367	2	27	2	1	1	2	1	2	1	4	2	2	1	1	11	""	2	#NULL!	#NULL!	2	#NULL!	2	1	1	2	1	3	1	10	""	2	2	1	1	1	2	""	2	""	5	2	2	1	2	1	2	2	2	2
821748	2	32	2	1	1	2	1	2	1	4	2	2	1	1	1	""	1	1	#NULL!	2	#NULL!	2	1	2	2	1	3	1	10	""	2	1	1	1	1	2	""	2	""	5	2	2	1	2	1	2	2	2	1
152637	2	30	2	1	1	2	2	2	2	1	2	2	1	1	6	""	2	#NULL!	#NULL!	2	#NULL!	2	1	4	2	1	6	1	8	""	2	2	1	1	3	2	""	2	""	5	2	2	1	2	1	2	2	2	1
487470	2	28	1	1	1	2	2	2	1	4	1	1	3	#NULL!	#NULL!	""	2	#NULL!	#NULL!	2	#NULL!	2	1	1	1	#NULL!	#NULL!	1	8	""	2	1	1	1	3	2	""	2	""	5	2	2	1	2	1	2	2	2	1
39920	2	38	2	1	1	2	2	2	1	4	2	2	2	#NULL!	#NULL!	""	2	#NULL!	#NULL!	2	#NULL!	2	1	4	2	1	4	1	3	""	2	1	1	1	1	2	""	2	""	5	2	2	1	2	1	2	2	2	2
784072	2	35	2	1	1	2	1	2	1	4	2	2	1	1	6	""	2	#NULL!	#NULL!	2	#NULL!	2	1	2	2	1	3	1	10	""	2	2	1	1	1	2	""	2	""	5	2	2	1	2	1	2	2	2	1
903385	2	30	1	1	1	2	2	2	1	4	2	2	2	#NULL!	#NULL!	""	2	#NULL!	#NULL!	2	#NULL!	2	1	2	2	1	3	1	3	""	2	2	2	1	1	2	""	1	"DM"	5	4	2	1	2	1	2	2	2	2
487445	2	24	2	1	1	2	2	2	1	4	1	1	3	#NULL!	#NULL!	""	2	#NULL!	#NULL!	2	#NULL!	2	1	2	1	#NULL!	#NULL!	1	11	""	2	1	1	1	1	2	""	2	""	5	2	2	1	2	1	2	2	2	1
487499	2	35	2	1	1	2	2	2	3	2	1	1	3	#NULL!	#NULL!	""	2	#NULL!	#NULL!	2	#NULL!	2	1	2	1	#NULL!	#NULL!	1	2	""	2	2	2	2	1	2	""	2	""	5	2	2	1	2	1	2	2	2	1
443139	2	37	2	1	1	2	1	2	1	4	2	2	1	1	3	""	2	#NULL!	#NULL!	2	#NULL!	2	1	2	2	1	3	1	10	""	2	2	1	1	1	2	""	2	""	5	2	2	1	2	1	2	2	2	2
295050	2	25	2	1	1	2	2	2	1	4	2	2	2	#NULL!	#NULL!	""	2	#NULL!	#NULL!	2	#NULL!	2	1	2	2	1	5	1	3	""	2	2	1	1	1	1	"APH"	2	""	5	2	2	1	2	1	2	2	2	2
421844	2	35	2	1	2	2	2	2	1	4	3	3	2	#NULL!	#NULL!	""	2	#NULL!	#NULL!	2	#NULL!	2	1	1	2	1	3	1	4	""	2	2	1	2	2	2	""	2	""	5	4	2	1	2	1	2	2	2	1
489334	2	22	1	1	1	2	2	2	1	4	1	1	3	#NULL!	#NULL!	""	2	#NULL!	#NULL!	2	#NULL!	2	1	1	2	1	4	1	3	""	2	2	1	1	1	2	""	2	""	5	2	2	1	2	1	2	2	2	2
489616	2	27	2	1	1	2	1	2	1	4	1	1	3	#NULL!	#NULL!	""	2	#NULL!	#NULL!	2	#NULL!	2	1	2	1	#NULL!	#NULL!	1	8	""	2	2	1	1	3	1	"APH"	2	""	5	2	2	1	2	1	2	2	2	1
489407	2	24	2	1	1	2	1	2	3	2	1	1	3	#NULL!	#NULL!	""	2	#NULL!	#NULL!	2	#NULL!	2	1	1	2	1	3	1	8	""	2	1	1	1	3	2	""	2	""	2	2	2	1	2	1	2	2	2	1
779785	2	27	2	1	1	2	1	2	2	1	2	2	1	1	6	""	1	1	#NULL!	2	#NULL!	2	1	2	1	#NULL!	#NULL!	1	9	""	2	2	1	1	1	1	"preterm labor"	2	""	5	2	2	1	2	1	2	2	2	1
488523	2	30	2	1	1	2	2	2	1	4	1	1	3	#NULL!	#NULL!	""	2	#NULL!	#NULL!	2	#NULL!	2	1	4	2	1	6	1	8	""	2	2	2	2	3	2	""	2	""	5	2	2	1	2	1	2	2	2	1
941813	2	28	2	1	1	2	2	2	1	4	2	2	2	#NULL!	#NULL!	""	2	#NULL!	#NULL!	2	#NULL!	2	1	1	2	1	5	1	2	""	2	2	2	1	1	2	""	2	""	5	2	2	1	2	1	2	2	2	1
490095	2	19	2	1	1	2	2	2	1	4	1	1	3	#NULL!	#NULL!	""	2	#NULL!	#NULL!	2	#NULL!	2	1	2	2	1	4	1	8	""	2	2	1	2	3	1	"chorioaminitis"	2	""	1	2	2	1	2	1	2	2	2	1
418206	2	25	2	1	1	2	1	2	2	2	1	1	3	#NULL!	#NULL!	""	2	#NULL!	#NULL!	2	#NULL!	2	1	2	2	1	4	1	11	""	2	1	1	1	1	2	""	2	""	5	1	2	1	2	1	2	2	2	1
489866	2	29	2	1	1	2	2	2	1	4	2	2	2	#NULL!	#NULL!	""	2	#NULL!	#NULL!	2	#NULL!	2	1	4	2	1	6	1	8	""	2	2	1	1	3	2	""	2	""	5	1	2	1	2	1	2	2	2	1
489067	2	24	2	1	1	2	1	2	1	4	1	1	3	#NULL!	#NULL!	""	2	#NULL!	#NULL!	2	#NULL!	2	1	2	2	1	5	1	8	""	2	2	1	1	3	2	""	2	""	5	2	2	1	2	1	2	2	2	2
447575	2	24	2	1	1	2	1	2	2	1	2	2	1	1	11	""	2	#NULL!	#NULL!	2	#NULL!	2	1	2	1	#NULL!	#NULL!	1	8	""	2	2	2	1	3	2	""	2	""	5	1	2	1	2	1	2	2	2	1
272179	2	38	2	1	1	2	1	2	1	4	2	2	1	1	11	""	2	#NULL!	#NULL!	2	#NULL!	2	1	4	2	1	2	1	10	""	2	2	1	1	1	1	"APH"	2	""	5	2	2	1	2	1	2	2	2	1
441258	2	19	2	1	1	2	2	2	1	4	1	1	3	#NULL!	#NULL!	""	2	#NULL!	#NULL!	2	#NULL!	2	1	1	2	1	5	1	8	""	2	2	1	1	2	2	""	2	""	5	2	2	1	2	1	2	2	2	1
489090	2	24	2	1	1	2	2	2	3	1	1	1	3	#NULL!	#NULL!	""	2	#NULL!	#NULL!	2	#NULL!	2	1	1	2	1	5	1	8	""	2	2	1	2	3	2	""	2	""	2	2	2	1	2	1	2	2	2	1
489239	2	24	2	1	1	2	2	2	1	4	1	1	3	#NULL!	#NULL!	""	1	1	#NULL!	2	#NULL!	2	1	4	2	1	4	1	3	""	2	2	1	1	1	2	""	2	""	5	2	2	1	2	1	2	2	2	2
488623	2	35	1	1	1	2	2	1	1	4	3	3	2	#NULL!	#NULL!	""	2	#NULL!	#NULL!	2	#NULL!	2	1	1	2	1	4	1	8	""	2	1	1	1	3	2	""	2	""	5	2	2	1	2	1	2	2	2	1
488588	2	37	1	1	1	2	2	1	1	4	2	2	1	1	11	""	2	#NULL!	#NULL!	2	#NULL!	2	1	4	1	#NULL!	#NULL!	1	10	""	2	1	1	1	1	2	""	2	""	5	2	2	1	2	1	2	2	2	1
279751	2	32	2	1	1	2	1	2	2	2	2	2	1	1	11	""	2	#NULL!	#NULL!	2	#NULL!	2	1	4	2	1	4	1	1	""	2	1	1	1	1	2	""	2	""	5	2	2	1	2	1	2	2	2	1
[truncated: 37 more columns]
