# Supplementary material for: Comparison of maternal and neonatal complications between first and second stage of labor cesarean deliveries at Mekelle public hospitals: a prospective cross-sectional study from February 2023 – June 2023
Source: Research Square preprint supplement (doi:10.21203/rs.3.rs-6957859/v1), 2025-08-19
Supplement: Supplementary file 2 [file f7fa5c872b10466277740145.docx]

## Data Extraction Form

Part I: Socio demographic status

| 1 | Data collector | Name  Signature | Remark: |
| --- | --- | --- | --- |
| 2 | Date of data collection |  |  |
| 3 | Phone No of the mother |  |  |
| 4 | Code |  |  |
| 5 | BMI |  |  |
| 6 | Maternal age | __________ (age in completed years) |  |
| 7 | Address | 1. Rural 2. Urban |  |
| 8 | Ethnicity | 1. Tigray 2. Afar 3. Amhara 4. Other |  |
| 9 | Religion | 1. Orthodox 2. Muslim 3. Protestant 4. Catholic 5. Others |  |
| 10 | Marital status | 1. Single 2. Married 3. Divorced 4. widowed |  |
| 11 | Referral | 1. Self-referred 2. Referred from other institutions 3. Self-arrival |  |
| 12 | Educational status | 1. Illiterate 2. Literate |  |
| 13 | Occupation |  |  |
| 14 | Income |  |  |

Part II: Past Obstetric profile

| 14 | Gravidity |  |
| --- | --- | --- |
| 15 | Parity |  |
| 16 | Mode of previous delivery | 1. Vaginal delivery 2. C/D 3. Laparotomy 4. NA |
| 17 | If previous delivery was C/D what was the indication | 1. CPD at first stage of labor 2. CPD at second stage of labor 3. Malpresentation 4. Failed induction 5. Poor progress of labor with x factor 6. Failed instrumental delivery 7. NRFHRP 8. Maternal indication 9. Previous CD with X factor 10. LPFSOL with X factor 11. Others (specify) |
| 18 | Abortion | 1. Yes b. No |
| 19 | If yes | 1. Spontaneous b. induced |
| 20 | If induced | 1. Medical b. surgical |
| 21 | Ectopic pregnancy | 1. Yes b. No |
| 22 | If it is yes mode of management | 1. Expectant 2. Medical 3. Laparoscopic 4. Laparotomy |
| 23 | GTD | 1. Yes b. No |

Part III: History of current pregnancy

| 24 | Antenatal care (If no skip to 26 ) | 1. Yes b. No |
| --- | --- | --- |
| 25 | If Yes, Place of ANC given | 1. Primary health care unit 2. General hospital 3. Tertiary hospital 4. Private health facility |
| 26 | Number of ANC visits | ________ |
| 27 | Gestational age determination  (if it is unknown skip to 29 ) | 1. Unknown 2. Known |
| 28 | Mode of gestational age determination | 1. By LNMP 2. By ultrasound |
| 29 | Gestational age | 1. In completed weeks |
| 30 | Number of fetus | 1. Singleton 2. Twin 3. Triplet 4. Quadruplet |
| 31 | Indication for C/D  (you can choose multiple) | 1. CPD at first stage of labor 2. CPD at second stage of labor 3. Malpresentation 4. Cord prolapsed 5. Failed induction 6. Poor progress of labor with x factor 7. Failed instrumental delivery 8. NRFHRP 9. Maternal indication 10. Previous CD with X factor 11. LPFSOL with X factor 12. Others (specify) |
| 32 | Level of deciding physician | 1. Junior resident 2. Senior resident 3. Consultant |
| 33 | Level of surgeon | 1. Junior resident 2. Senior resident 3. Consultant |
|  | Labor characteristics | |
| 34 | Stage of labor | 1. 1st stage 2. 2nd stage |
| 35 | Duration of ROM | __________hours   1. <12 hours 2. >12 hours |
| 36 | FHB | 1. Normal 2. Bradycardia 3. Tachycardia 4. Negative |
| 37 | Obstetric complication (you can choose multiple) | 1. PE/Eclamspsia 2. PROM 3. Chorioaminitis 4. GDM 5. APH 6. Anemia in pregnancy 7. Others (specify) ______ |
| 38 | Known chronic medical illness | 1. DM 2. Cardiac disease 3. Renal disease 4. Liver disease 5. Respiratory disease 6. Endocrine pathology 7. Hematologic disorders 8. Others specify |
| 39 | Interventions (you can choose multiple) | - 1. Induction   2. Augmentation   3. ARM   4. Trial of instrument |
|  | Operation characteristics | |
| 40 | Mode of anesthesia | 1. Epidural 2. Spinal 3. Spinal converted to GA 4. GA |
| 41 | Cleansing method | 1. Alcohol 2. Povidone Iodine 3. Chlorohexidine |
| 42 | Vaginal cleansing | 1. Yes b. No |
| 43 | Skin incision | 1. Midline incision 2. Transverse incision |
| 44 | Type of uterine incision | 1. Kerr incision 2. Low vertical 3. Inverted T 4. J incision 5. Classical |
| 45 | Meconium stained amniotic fluid (thick) | 1. Yes b. No |
| 46 | Paracolic gutter packing | 1. Yes b. No |
| 47 | Intra-OP glove change | 1. Yes b. No |
| 48 | Mode of extraction | 1. Cephalic 2. Breach 3. Reversed breach |
| 49 | Decision to skin incision time | 1. <30 minutes 2. 30-60 minutes 3. >60 minutes |
| 50 | Skin Incision to delivery time | 1. <3 minutes 2. > 3 minutes |
| 51 | Prophylactic antibiotics | 1. Yes b. No |
| 52 | Intra-OP complication (you can choose multiple) | - 1. Extension   2. Atony   3. Hysterectomy   4. Bladder injury   5. Bowel injury   6. Ureteric injury   7. Vascular injury   8. PPH   9. Blood transfusion   10. Adhesion   11. Relaparotomy   12. Others(specify) _________   13. None |
| 53 | Post-OP complication (you can choose multiple) | 1. Anemia 2. Wound infection 3. Endomyometritis 4. Paralytic ileus 5. Post spinal headache 6. DVT 7. Obstetric fistula 8. Sciatic nerve injury 9. Incontinence 10. Others (specify) ________ 11. None |
| 54 | Hospital stay |  |
|  | Neonatal Outcome | |
| 55 | Outcome | 1. Alive 2. Dead |
| 56 | APGAR score | __________ |
| 57 | Weight | ___________ |
| 58 | Birth injury | 1. Yes b. No |
| 59 | If yes for the above specify |  |
| 60 | NICU admission | 1. Yes b. No |
| 61 | If yes what was the diagnosis | 1. PNA 2. Sepsis 3. MAS 4. Others (specify) |
